Vann *et al.*: Variation in teosinte at the *tb1* locus

## Natural variation in teosinte at the domestication locus *teosinte branched1* (*tb1*)<sup>1</sup>

Laura Vann<sup>2</sup>, Thomas Kono<sup>2,3</sup>, Tanja Pyhäjärvi<sup>2,4</sup>, Matthew B. Hufford<sup>2,5,7</sup>, and Jeffrey Ross-Ibarra<sup>2,6,7</sup>

<sup>2</sup>Department of Plant Sciences, University of California Davis

<sup>3</sup>Department of Agronomy and Plant Genetics, University of Minnesota Twin Cities

<sup>4</sup>Department of Biology, University of Oulu

<sup>5</sup>Department of Ecology, Evolution, and Organismal Biology, Iowa State University

<sup>6</sup>Center for Population Biology and Genome Center, University of California Davis

<sup>7</sup>Author for Correspondence

---

1

Manuscript received \_\_\_\_\_; revision accepted \_\_\_\_\_.

## **Acknowledgements**

The authors thank the Department of Plant Sciences at UC Davis for graduate student research funding to LEV and for research funds supporting the project, UC Mexus for a postdoctoral scholar grant to MBH and JR-I, and G. Coop for helpful discussion.

## 1 Abstract

2 *Premise of the study:* The *teosinte branched1* (*tb1*) gene is a major QTL controlling branching  
3 differences between maize and its wild progenitor, teosinte. The insertion of a transposable  
4 element (*Hopscotch*) upstream of *tb1* is known to enhance the gene's expression, causing reduced  
5 tillering in maize. Observations of the maize *tb1* allele in teosinte and estimates of an insertion  
6 age of the *Hopscotch* that predates domestication led us to investigate its prevalence and  
7 potential role in teosinte.

8 *Methods:* Prevalence of the *Hopscotch* element was assessed across an Americas-wide sample of  
9 1110 maize and teosinte individuals using a co-dominant PCR assay. Population genetic  
10 summaries were calculated for a subset of individuals from four teosinte populations in central  
11 Mexico. Phenotypic data were also collected from a single teosinte population where *Hopscotch*  
12 was found segregating.

13 *Key results:* Genotyping results suggest the *Hopscotch* element is at higher than expected  
14 frequency in teosinte. Analysis of linkage disequilibrium near *tb1* does not support recent  
15 introgression of the *Hopscotch* allele from maize into teosinte. Population genetic signatures are  
16 consistent with selection on this locus revealing a potential ecological role for *Hopscotch* in  
17 teosinte. Finally, two greenhouse experiments with teosinte do not suggest *tb1* controls tillering in  
18 natural populations.

19 *Conclusions:* Our findings suggest the role of *Hopscotch* differs between maize and teosinte.  
20 Future work should assess *tb1* expression levels in teosinte with and without the *Hopscotch* and  
21 more comprehensively phenotype teosinte to assess the ecological significance of the *Hopscotch*  
22 insertion and, more broadly, the *tb1* locus in teosinte.

23 **Key words:** domestication; maize; teosinte; *teosinte branched1*; transposable element

1

## INTRODUCTION

2 Domesticated crops and their wild progenitors provide an excellent system in which to study  
3 adaptation and genomic changes associated with human-mediated selection (Ross-Ibarra et al.,  
4 2007). Perhaps the central focus of the study of domestication has been the identification of  
5 genetic variation underlying agronomically important traits such as fruit size and plant  
6 architecture (Olsen and Gross, 2010). Additionally, many domesticates show reduced genetic  
7 diversity when compared to their wild progenitors, and an understanding of the distribution of  
8 diversity in the wild and its phenotypic effects has become increasingly useful to crop  
9 improvement (Kovach and McCouch, 2008). But while some effort has been invested into  
10 understanding how wild alleles behave in their domesticated relatives (e.g. Bai and Lindhout,  
11 2007), very little is known about the role that alleles found most commonly in domesticates play  
12 in natural populations of their wild progenitors (Whitton et al., 1997).

13 Maize (*Zea mays* ssp. *mays*) was domesticated from the teosinte *Zea mays* ssp. *parviglumis*  
14 (hereafter, *parviglumis*) roughly 9,000 B.P. in southwest Mexico (Piperno et al., 2009; Matsuoka  
15 et al., 2002). Domesticated maize and the teosintes are an attractive system in which to study  
16 domestication due to the abundance of genetic tools developed for maize and well-characterized  
17 domestication loci (Hufford et al., 2012a; Doebley, 2004; Hufford et al., 2012b). Additionally,  
18 large naturally occurring populations of both *Zea mays* ssp. *parviglumis* (the wild progenitor of  
19 maize) and *Zea mays* ssp. *mexicana* (highland teosinte; hereafter *mexicana*) can be found  
20 throughout Mexico (Wilkes, 1977; Hufford et al., 2013), and genetic diversity of these taxa is  
21 estimated to be high (Ross-Ibarra et al., 2009).

22 Many morphological changes are associated with maize domestication, and understanding the  
23 genetic basis of these changes has been a focus of maize research for a number of years (Doebley,  
24 2004). One of the most dramatic changes is found in plant architecture: domesticated maize is  
25 characterized by a central stalk with few tillers and lateral branches terminating in a female  
26 inflorescence, while teosinte is highly tillered and bears tassels (male inflorescences) at the end of  
27 its lateral branches. The *teosinte branched1* (*tb1*) gene, a repressor of organ growth, was  
28 identified as a major QTL involved in branching (Doebley et al., 1995) and tillering (Doebley and  
29 Stec, 1991) differences between maize and teosinte. A 4.9 kb retrotransposon (*Hopscotch*)  
30 insertion into the upstream control region of *tb1* in maize acts to enhance expression of *tb1*, thus  
31 repressing lateral organ growth (Doebley et al., 1997; Studer et al., 2011). Dating of the

1 *Hopscotch* retrotransposon suggests that its insertion predates the domestication of maize, leading  
2 to the hypothesis that it was segregating as standing variation in ancient populations of teosinte  
3 and increased to high frequency in maize due to selection during domestication (Studer et al.,  
4 2011). The effects of the *Hopscotch* insertion have been studied in maize (Studer et al., 2011),  
5 and analysis of teosinte alleles at *tb1* has identified functionally distinct allelic classes (Studer and  
6 Doebley, 2012), but little is known about the role of *tb1* or the *Hopscotch* insertion in natural  
7 populations of teosinte.

8 In teosinte and other plants that grow at high population density, individuals detect  
9 competition from neighbors via the ratio of red to far-red light. An increase in far-red relative to  
10 red light accompanies shading and triggers the shade avoidance syndrome: a suite of physiological  
11 and morphological changes such as reduced tillering, increased plant height and early flowering  
12 (Kebrom and Brutnell, 2007). The *tb1* locus appears to play an important role in the shade  
13 avoidance pathway in *Zea mays* and other grasses and may therefore be crucial to the ecology of  
14 teosinte (Kebrom and Brutnell, 2007; Lukens and Doebley, 1999). In this study we aim to  
15 characterize the distribution of the *Hopscotch* insertion in *parviglumis*, *mexicana*, and landrace  
16 maize, and to examine the phenotypic effects of the insertion in *parviglumis*. We use a  
17 combination of PCR genotyping for the *Hopscotch* element in our full panel and sequencing of  
18 two small regions upstream of *tb1* in a subset of teosinte populations to explore patterns of  
19 genetic variation at this locus. Finally, we test for an association between the *Hopscotch* element  
20 and tillering phenotypes in a population of *parviglumis*.

## 21 MATERIALS AND METHODS

22 **Sampling and genotyping**—We sampled 1,110 individuals from 350 accessions (247 maize  
23 landraces, 17 *mexicana* populations, and 86 *parviglumis* populations) and assessed the presence or  
24 absence of the *Hopscotch* insertion (Appendix 1 and Appendix 2, See Supplemental Materials  
25 with the online version of this article). DNA was extracted from leaf tissue using a modified  
26 CTAB approach (Doyle and Doyle, 1990; Maloof et al., 1984). We designed primers using  
27 PRIMER3 (Rozen and Skaletsky, 2000) implemented in Geneious (Kearse et al., 2012) to amplify  
28 the entire *Hopscotch* element, as well as an internal primer allowing us to simultaneously check  
29 for possible PCR bias between presence and absence of the *Hopscotch* insertion. Two PCRs were  
30 performed for each individual, one with primers flanking the *Hopscotch* (HopF/HopR) and one  
31 with a flanking primer and an internal primer (HopF/HopIntR). Primer sequences are HopF,

1 5'-TCGTTGATGCTTTGATGGATGG-3'; HopR, 5'-AACAGTATGATTTTCATGGGACCG-3'; and  
2 HopIntR, 5'-CCTCCACCTCTCATGAGATCC-3' (Appendix 3 and Appendix 4, See Supplemental  
3 Materials with the online version of this article). Homozygotes show a single band for absence of  
4 the element (~300bp) and two bands for presence of the element (~5kb and ~1.1kb), whereas  
5 heterozygotes are three-banded (Appendix 2, See Supplemental Materials with the online version  
6 of this article). When only one PCR resolved well, we scored one allele for the individual. We  
7 used Phusion High Fidelity Enzyme (Thermo Fisher Scientific Inc., Waltham, Massachusetts,  
8 USA) and the following conditions for amplifications: 98°C for 3 min, 30 cycles of 98°C for 15 s,  
9 65°C for 30 s, and 72°C for 3 min 30 s, with a final extension of 72°C for 10 min. PCR products  
10 were visualized on a 1% agarose gel and scored for presence/absence of the *Hopscotch* based on  
11 band size.

12 **Sequencing**—In addition to genotyping, we chose a subset of *parviglumis* individuals for  
13 sequencing. We chose twelve individuals from each of four populations from Jalisco state, Mexico  
14 (San Lorenzo, La Mesa, Ejutla A, and Ejutla B). For amplification and sequencing, we selected  
15 two regions approximately 600bp in size from within the 5' UTR of *tb1* (Region 1) and from  
16 1,235bp upstream of the start of the *Hopscotch* (66,169bp upstream from the start of the *tb1*  
17 ORF; Region 2). We designed the following primers using PRIMER3 (Rozen and Skaletsky, 2000):  
18 for the 5' UTR, 5'-GGATAATGTGCACCAGGTGT-3' and 5'-GCGTGCTAGAGACACYTGTGCT-3';  
19 for the 66kb upstream region, 5'-TGTCCTCGCCGCAACTC-3' and  
20 5'-TGTACGCCCGCCCCTCATCA-3' (Appendix 1, See Supplemental Materials with the online  
21 version of this article). We used Taq polymerase (New England Biolabs Inc., Ipswich,  
22 Massachusetts, USA) and the following thermal cycler conditions to amplify fragments: 94°C for  
23 3 min, 30 cycles of 92°C for 40 s, annealing for 1 min, 72°C for 40 s, and a final 10 min extension  
24 at 72°C. Annealing temperatures for Region 1 and Region 2 were 59.7°C and 58.8°C, respectively.  
25 To clean excess primer and dNTPs we added two units of Exonuclease1 and 2.5 units of Antarctic  
26 Phosphatase to 8.0  $\mu$ L of amplification product. This mix was placed on a thermal cycler with  
27 the following program: 37°C for 30 min, 80°C for 15 min, and a final cool-down step to 4°C.

28 We cloned cleaned fragments into a TOPO-TA vector (Life Technologies, Grand Island, New  
29 York, USA) using OneShot TOP10 chemically competent *E. coli* cells, with an extended ligation  
30 time of 30 min for a complex target fragment. We plated cells on LB agar plates containing  
31 kanamycin, and screened colonies using vector primers M13 Forward and M13 Reverse under the  
32 following conditions: 96°C for 5 min; then 35 cycles at 96°C for 30 s, 53°C for 30 s, 72°C for 2

1 min; and a final extension at 72°C for 4 min. We visualized amplification products for  
2 incorporation of our insert on a 1% agarose TAE gel.

3 Amplification products with successful incorporation of our insert were cleaned using  
4 Exonuclease 1 and Antarctic Phosphatase following the procedures detailed above, and sequenced  
5 with vector primers M13 Forward and M13 Reverse using Sanger sequencing at the College of  
6 Agriculture and Environmental Sciences (CAES) sequencing center at UC Davis. We aligned and  
7 trimmed primer sequences from resulting sequences using the software Geneious (Kearse et al.,  
8 2012). Following alignment, we verified singleton SNPs by sequencing an additional one to four  
9 colonies from each clone. If the singleton was not present in these additional sequences it was  
10 considered an amplification or cloning error, and we replaced the base with the base of the  
11 additional sequences. If the singleton appeared in at least one of the additional sequences we  
12 considered it a real variant and kept it for further analyses.

13 **Genotyping analysis**—To calculate differentiation between populations ( $F_{ST}$ ) and  
14 subspecies ( $F_{CT}$ ) we used HierFstat (Goudet, 2005). These analyses only included populations in  
15 which eight or more individuals were sampled. To test the hypothesis that the *Hopscotch*  
16 insertion may be adaptive under certain environmental conditions, we looked for significant  
17 associations between the *Hopscotch* frequency and environmental variables using BayEnv (Coop  
18 et al., 2010). BayEnv creates a covariance matrix of relatedness between populations and then  
19 tests a null model that allele frequencies in populations are determined by the covariance matrix  
20 of relatedness alone against the alternative model that allele frequencies are determined by a  
21 combination of the covariance matrix and an environmental variable, producing a posterior  
22 probability (*i.e.*, Bayes Factor; Coop et al. 2010). We used genotyping and covariance data from  
23 Pyhäjärvi et al. (2013) for BayEnv, with the *Hopscotch* insertion coded as an additional SNP.  
24 Environmental data were obtained from [www.worldclim.org](http://www.worldclim.org), the Harmonized World Soil  
25 Database (FAO/IIASA/ISRIC/ISSCAS/JRC, 2012) and [www.harvestchoice.org](http://www.harvestchoice.org) and  
26 summarized by principle component analysis following Pyhäjärvi et al. (2013).

27 **Sequence analysis**—For population genetic analyses of sequenced Region 1 and sequenced  
28 Region 2 we used the Libsequence package (Thornton, 2003) to calculate pairwise  $F_{ST}$  between  
29 populations and to calculate standard diversity statistics (number of haplotypes, haplotype  
30 diversity, Watterson’s estimator  $\hat{\theta}_W$ , pairwise nucleotide diversity  $\hat{\theta}_\pi$ , and Tajima’s D). To  
31 produce a visual representation of differentiation between sequences and examine patterns in  
32 sequence clustering by *Hopscotch* genotype we used Phylip

1 (<http://evolution.genetics.washington.edu/phylip.html>), creating neighbor-joining trees  
2 with bootstrap-supported nodes (100 repetitions). For creation of trees we also included  
3 homologous sequence data from Maize HapMapV2 (Chia et al., 2012) for teosinte inbred lines  
4 (TILs), some of which are known to be homozygous for the *Hopscotch* insertion (TIL03, TIL17,  
5 TIL09), as well as 59 lines of domesticated maize.

6 **Introgression analysis**—In order to assess patterns of linkage disequilibrium (LD) around  
7 the *Hopscotch* element in the context of chromosomal patterns of LD we used Tassel (Bradbury  
8 et al., 2007) and calculated LD between SNPs across chromosome 1 using previously published  
9 data from twelve plants each of the Ejutla A (EjuA), Ejutla B (EjuB), San Lorenzo (SLO), and  
10 La Mesa (MSA) populations (Pyhäjärvi et al., 2013). We chose these populations because we had  
11 both genotyping data for the *Hopscotch* as well as chromosome-wide SNP data for chromosome 1.  
12 For each population we filtered the initial set of 5,897 SNPs on chromosome 1 to accept only  
13 SNPs with a minor allele frequency of at least 0.1, resulting in 1,671, 3,023, 3,122, and 2,167  
14 SNPs for SLO, EjuB, EjuA, and MSA, respectively. We then used Tassel (Bradbury et al., 2007)  
15 to calculate linkage disequilibrium ( $r^2$ ) across chromosome 1 for each population.

16 We examined evidence of introgression on chromosome 1 in these same four populations  
17 (EjuA, EjuB, MSA, SLO) using STRUCTURE (Falush et al., 2003) and phased data from  
18 Pyhäjärvi et al. (2013), combined with the corresponding SNP data from a diverse panel of 282  
19 maize lines (Cook et al., 2012). SNPs were anchored in a modified version of the IBM genetic  
20 map (Gerke et al., 2013). We created haplotype blocks using a custom Perl script that grouped  
21 SNPs separated by less than 5kb into haplotypes. We ran STRUCTURE at  $K=2$  under the  
22 linkage model, performing 3 replicates with an MCMC burn-in of 10,000 steps and 50,000 steps  
23 post burn-in.

24 **Phenotyping of *parviglumis***—To investigate the phenotypic effects of the *Hopscotch*  
25 insertion in teosinte, we conducted an initial phenotyping trial (Phenotyping 1). We germinated  
26 250 seeds of *parviglumis* collected in Jalisco state, Mexico (population San Lorenzo) (Hufford,  
27 2010) where the *Hopscotch* is segregating at highest frequency (0.44) in our initial genotyping  
28 sample set. In order to maximize the likelihood of finding the *Hopscotch* in our association  
29 population we selected seeds from sites where genotyped individuals were homozygous or  
30 heterozygous for the insertion. We chose between 10-13 seeds from each of 23 sampling sites. We  
31 treated seeds with Captan fungicide (Southern Agricultural Insecticides Inc., Palmetto, Florida,  
32 USA) and germinated them in petri dishes with filter paper. Following germination, 206



1 successful germinations were planted into one-gallon pots with potting soil and randomly spaced  
2 one foot apart on greenhouse benches. Plants were watered three times a day by hand and with  
3 an automatic drip containing 10-20-10 fertilizer.

4 Starting on day 15, we measured tillering index as the ratio of the sum of tiller lengths to the  
5 height of the plant (Briggs et al., 2007). Following initial measurements, we phenotyped plants for  
6 tillering index every 5 days through day 40, and then on day 50 and day 60. On day 65 we  
7 measured culm diameter between the third and fourth nodes of each plant. Culm diameter is not  
8 believed to be correlated with tillering index or variation at *tb1*. Following phenotyping we  
9 extracted DNA from all plants using a modified SDS extraction protocol. We genotyped  
10 individuals for the *Hopscotch* insertion following the protocols listed above. Based on these initial  
11 data, we conducted a *post hoc* power analysis using data from day 40 of Phenotyping 1, indicating  
12 that a minimum of 71 individuals in each genotypic class would be needed to detect the observed  
13 effect of the *Hopscotch* on tillering index.

14 We performed a second phenotyping experiment (Phenotyping 2) in which we germinated 372  
15 seeds of *parviglumis*, choosing equally between sites previously determined to have or not have the  
16 *Hopscotch* insertion. Seeds were germinated and planted on day 7 post fruit-case removal into two  
17 gallon pots. Plants were watered twice daily, alternating between fertilized and non-fertilized  
18 water. We began phenotyping successful germinations (302 plants) for tillering index on day 15  
19 post fruit-case removal, and phenotyped every five days until day 50. At day 50 we measured  
20 culm diameter between the third and fourth nodes. We extracted DNA and genotyped plants  
21 following the same guidelines as in Phenotyping 1.

22 Tillering index data for each genotypic class did not meet the criteria for a repeated measures  
23 ANOVA, so we transformed the data using a Box-Cox transformation ( $\lambda = 0$ ) (Car Package for R,  
24 Fox and Weisberg 2011) to improve the normality and homogeneity of variance among genotype  
25 classes. We analyzed relationships between genotype and tillering index and tiller number using a  
26 repeated measures ANOVA through a general linear model function implemented in SAS v.9.3  
27 (SAS Institute Inc., Cary, NC, USA). Additionally, in order to compare any association between  
28 *Hopscotch* genotype and tillering and associations at other presumably unrelated traits, we  
29 performed an ANOVA between culm diameter and genotype using the same general linear model  
30 in SAS.

1

## RESULTS

2

**Genotyping**—Genotype of the *Hopscotch* insertion was confirmed with two PCRs for 837 individuals. Among the 247 maize landrace accessions genotyped, all but eight were homozygous for the presence of the insertion (Appendix 1 and Appendix 2, See Supplemental Materials with the online version of this article). Within our *parviglumis* and *mexicana* samples we found the *Hopscotch* insertion segregating in 37 and four populations, respectively, and at highest frequency in the states of Jalisco, Colima, and Michoacán in central-western Mexico (Fig. 1). Using our *Hopscotch* genotyping, we calculated differentiation between populations ( $F_{ST}$ ) and subspecies ( $F_{CT}$ ) for populations in which we sampled eight or more alleles. We found that  $F_{CT} = 0$ , and levels of  $F_{ST}$  among populations within each subspecies (0.22) and among all populations (0.23) are similar to those reported genome-wide in previous studies (Pyhäjärvi et al. 2013; Table 1). Although we found large variation in *Hopscotch* allele frequency among our populations, BayEnv analysis did not indicate a correlation between the *Hopscotch* insertion and environmental variables (all Bayes Factors  $< 1$ ).

**Sequencing**—To investigate patterns of sequence diversity and linkage disequilibrium (LD) in the *tb1* region, we sequenced two small ( $< 1$ kb) regions upstream of the *tb1* ORF in four populations. After alignment and singleton checking we recovered 48 and 40 segregating sites for the 5' UTR region (Region 1) and the 66kb upstream region (Region 2), respectively. For Region 1, Ejutla A has the highest values of haplotype diversity and  $\theta_\pi$ , while Ejutla B and La Mesa have comparable values of these summary statistics, and San Lorenzo has much lower values. Additionally, Tajima's D is strongly negative in the two Ejutla populations and La Mesa, but is less negative in San Lorenzo (Table 2, Appendix 2, See Supplemental Materials with the online version of this article). For Region 2, haplotype diversity and  $\theta_\pi$ , are similar for Ejutla A and Ejutla B, while La Mesa and San Lorenzo have slightly lower values for these statistics (Table 2). Tajima's D is positive in all populations except La Mesa, indicating an excess of low frequency variants in this population (Table 2). Pairwise values of  $F_{ST}$  within population pairs Ejutla A/Ejutla B and San Lorenzo/La Mesa are close to zero for both sequenced regions as well as for the *Hopscotch*, while they are high for other population pairs (Table 1). Neighbor joining trees of our sequence data and data from the teosinte inbred lines (TILs; data from Maize HapMapV2, Chia et al. 2012) do not reveal any clear clustering pattern with respect to population or *Hopscotch* genotype (Appendix 5, See Supplemental Materials with the online version of this

1 article); individuals within our sample that have the *Hopscotch* insertion do not group with the  
2 teosinte inbred lines or domesticated maize that have the *Hopscotch* insertion.

3 **Evidence of introgression**—The highest frequency of the *Hopscotch* insertion in teosinte  
4 was found in *parviglumis* sympatric with cultivated maize. Our initial hypothesis was that the  
5 high frequency of the *Hopscotch* element in these populations could be attributed to introgression  
6 from maize into teosinte. To investigate this possibility we examined overall patterns of linkage  
7 disequilibrium across chromosome one and specifically in the *tb1* region. If the *Hopscotch* is found  
8 in these populations due to recent introgression we would expect to find large blocks of linked  
9 markers near this element. We find no evidence of elevated linkage disequilibrium between the  
10 *Hopscotch* and SNPs surrounding the *tb1* region in our resequenced populations (Figure 2), and  
11  $r^2$  in the *tb1* region does not differ significantly between populations with (average  $r^2$  of 0.085)  
12 and without (average  $r^2 = 0.082$ ) the *Hopscotch* insertion. In fact, average  $r^2$  is lower in the *tb1*  
13 region ( $r^2 = 0.056$ ) than across the rest of chromosome 1 ( $r^2 = 0.083$ ; Table 3).

14 The lack of clustering of *Hopscotch* genotypes in our NJ tree as well as the lack of LD around  
15 *tb1* do not support the hypothesis that the *Hopscotch* insertion in these populations of *parviglumis*  
16 is the result of recent introgression. However, to further explore this hypothesis we performed a  
17 STRUCTURE analysis using Illumina MaizeSNP50 data from four of our *parviglumis* populations  
18 (EjuA, EjuB, MSA, and SLO) and the maize 282 diversity panel (Cook et al., 2012; Pyhäjärvi  
19 et al., 2013). The linkage model implemented in STRUCTURE can be used to identify ancestry of  
20 blocks of linked variants which would arise as the result of recent admixture between populations.  
21 If the *Hopscotch* insertion is present in populations of *parviglumis* as a result of recent admixture  
22 with domesticated maize, we would expect the insertion and linked variants in surrounding sites  
23 to be assigned to the "maize" cluster in our STRUCTURE runs, not the "teosinte" cluster. In all  
24 runs, assignment to maize in the *tb1* region across all four *parviglumis* populations is low (average  
25 0.017) and much below the chromosome-wide average (0.20; Table 4; Fig. 3).

26 **Phenotyping**—To assess the contribution of *tb1* to phenotypic variation in tillering in a  
27 natural population, we grew plants from seed sampled from the San Lorenzo population of  
28 *parviglumis*, which had a high mean frequency (0.44) of the *Hopscotch* insertion based on our  
29 initial genotyping. We measured tillering index (TI), the ratio of the sum of tiller lengths to plant  
30 height, for 216 plants (Phenotyping 1) from within the San Lorenzo population, and genotyped  
31 plants for the *Hopscotch* insertion. We found the *Hopscotch* segregating at a frequency of 0.65  
32 with no significant deviations from expected frequencies under Hardy-Weinberg equilibrium.

1 After performing a repeated measures ANOVA between our transformed tillering index data and  
2 *Hopscotch* genotype we find no correlation between genotype at the *Hopscotch* insertion and  
3 tillering index (Fig. 4), tiller number, or culm diameter.

4 We performed a second grow-out of *parviglumis* from San Lorenzo (Phenotyping 2) to assess  
5 whether lighting conditions or sample size may have affected our ability to detect an effect of *tb1*.  
6 For the second grow-out we measured tillering index every five days through day 50 for 302  
7 plants. We found the *Hopscotch* allele segregating at a frequency of 0.69, with a 0.6 frequency of  
8 *Hopscotch* homozygotes, and a 0.2 frequency of both heterozygotes and homozygotes for the  
9 teosinte allele. Results were similar to Phenotyping 1, with no significant correlation between  
10 *Hopscotch* and any of the three phenotypes measured.

## 11 DISCUSSION

12 Adaptation occurs due to selection on standing variation or *de novo* mutations. Adaptation  
13 from standing variation has been well-described in a number of systems; for example, selection for  
14 lactose tolerance in humans (Plantinga et al., 2012; Tishkoff et al., 2007), variation at the *Eda*  
15 locus in three-spined stickleback (Kitano et al., 2008; Colosimo et al., 2005), and pupal diapause  
16 in the Apple Maggot fly (Feder et al., 2003). Although the adaptive role of standing variation has  
17 been described in many systems, its importance in domestication is not as well studied.

18 In maize, alleles at domestication loci (*RAMOSA1*, Sigmon and Vollbrecht 2010; *barren*  
19 *stalk1*, Gallavotti et al. 2004; and *grassy tillers1*, Whipple et al. 2011) are thought to have been  
20 selected from standing variation, suggesting that diversity already present in teosinte may have  
21 played an important role in maize domestication. The *teosinte branched1* gene is one of the best  
22 characterized domestication loci, and, while previous studies have suggested that differences in  
23 plant architecture between maize and teosinte are a result of selection on standing variation at  
24 this locus (Clark et al., 2006; Studer et al., 2011), much remains to be discovered regarding  
25 natural variation at this locus and its ecological role in teosinte.

26 Studer et al. (2011) genotyped 90 accessions of teosinte (inbred and outbred), providing the  
27 first evidence that the *Hopscotch* insertion is segregating in teosinte (Studer et al., 2011). Given  
28 that the *Hopscotch* insertion has been estimated to predate the domestication of maize, it is not  
29 surprising that it can be found segregating in populations of teosinte. However, by widely  
30 sampling across teosinte populations our study provides greater insight into the distribution and  
31 prevalence of the *Hopscotch* in teosinte. While our findings are consistent with Studer et al.

1 (2011) in that we identify the *Hopscotch* allele segregating in teosinte, we find it at higher  
2 frequency than previously suggested. Many of our populations with a high frequency of the  
3 *Hopscotch* allele fall in the Jalisco cluster identified by Fukunaga et al. (2005), perhaps suggesting  
4 a different history of the *tb1* locus in this region than in the Balsas River Basin where maize was  
5 domesticated (Matsuoka et al., 2002). Potential explanations for the high frequency of the  
6 *Hopscotch* element in *parviglumis* from the Jalisco cluster include gene flow from maize, genetic  
7 drift, and natural selection.

8 While gene flow from crops into their wild relatives is well-known, (Ellstrand et al., 1999;  
9 Zhang et al., 2009; Thurber et al., 2010; Baack et al., 2008; Hubner et al., 2012; Wilkes, 1977; van  
10 Heerwaarden et al., 2011; Barrett, 1983), our results are more consistent with Hufford et al.  
11 (2013) who found resistance to introgression from maize into teosinte around domestication loci.  
12 We find no evidence of recent introgression in our analyses. Clustering in our NJ trees do not  
13 reflect the pattern expected if maize alleles at the *tb1* locus had introgressed into populations of  
14 teosinte. Moreover, there is no signature of elevated LD in the *tb1* region relative to the rest of  
15 chromosome 1, and Bayesian assignment to a maize cluster in this region is both low and below  
16 the chromosome-wide average (Fig. 3, Table 4). Together, these data point to an explanation  
17 other than recent introgression for the high observed frequency of *Hopscotch* in a subset of our  
18 *parviglumis* populations.

19 Although recent introgression seems unlikely, we cannot rule out ancient introgression as an  
20 explanation for the presence of the *Hopscotch* in these populations. If the *Hopscotch* allele was  
21 introgressed in the distant past, recombination may have broken up LD, a process that would be  
22 consistent with our data. We find this scenario less plausible, however, as there is no reason why  
23 gene flow should have been high in the past but absent in present-day sympatric populations. In  
24 fact, early generation maize-teosinte hybrids are common in these populations today (MB  
25 Hufford, pers. observation), and genetic data support ongoing gene flow between domesticated  
26 maize and both *mexicana* and *parviglumis* in a number of sympatric populations (Hufford et al.,  
27 2013; Ellstrand et al., 2007; van Heerwaarden et al., 2011).

28 Remaining explanations for differential frequencies of the *Hopscotch* among teosinte  
29 populations include both genetic drift and natural selection. Previous studies using both SSRs  
30 and genome-wide SNP data have found evidence for a population bottleneck in the San Lorenzo  
31 population (Hufford, 2010; Pyhäjärvi et al., 2013), and the lower levels of sequence diversity in  
32 this population in the 5' UTR (Region 1) coupled with more positive values of Tajima's D are

1 consistent with these earlier findings. Such population bottlenecks can exaggerate the effects of  
2 genetic drift through which the *Hopscotch* allele may have risen to high frequency entirely by  
3 chance. A bottleneck in San Lorenzo, however, does not explain the high frequency of the  
4 *Hopscotch* in multiple populations in the Jalisco cluster. Moreover, available information on  
5 diversity and population structure among Jaliscan populations (Hufford, 2010; Pyhäjärvi et al.,  
6 2013) is not suggestive of recent colonization or other demographic events that would predict a  
7 high frequency of the allele across populations. Finally, diversity values in the 5' UTR of *tb1* are  
8 suggestive of natural selection acting upon the gene in natural populations of *parviglumis*. Overall  
9 nucleotide diversity is 76% less than seen in the sequences from the 66kb upstream region, and  
10 Tajima's D is considerably lower and consistently negative. In fact, values of Tajima's D in the 5'  
11 UTR are toward the extreme negative end of the distribution of this statistic previously  
12 calculated across loci sequenced in *parviglumis* (Wright et al., 2005; Moeller et al., 2007). Though  
13 not definitive, these results are consistent with the action of selection on the upstream region of  
14 *tb1*, perhaps suggesting an ecological role for the gene in *parviglumis*.

15 Significant effects of the *Hopscotch* insertion on lateral branch length, number of cupules, and  
16 tillering index in domesticated maize have been well documented (Studer et al., 2011). Weber  
17 et al. (2007) described significant phenotypic associations between markers in and around *tb1* and  
18 lateral branch length and female ear length in a sample from 74 natural populations of  
19 *parviglumis* (Weber et al., 2007); however, these data did not include markers from the *Hopscotch*  
20 region 66kb upstream of *tb1*. Our study is the first to explicitly examine the phenotypic effects of  
21 the *Hopscotch* insertion across a wide collection of individuals sampled from natural populations  
22 of teosinte. We have found no significant effect of the *Hopscotch* insertion on tillering index or  
23 tiller number, a result that is discordant with its clear phenotypic effects in maize. One  
24 interpretation of this result would be that the *Hopscotch* controls tillering in maize (Studer et al.,  
25 2011), but tillering in teosinte is affected by variation at other loci. Consistent with this  
26 interpretation, *tb1* is thought to be part of a complex pathway controlling branching, tillering and  
27 other phenotypic traits (Kebrom and Brutnell, 2007; Clark et al., 2006). A recent study by  
28 Studer and Doebley (2012) examined variation across traits in a three-taxa allelic series at the *tb1*  
29 locus. Studer and Doebley (2012) introgressed nine unique teosinte *tb1* segments (one from *Zea*  
30 *diploperennis*, and four each from *mexicana* and *parviglumis*) into an inbred maize background  
31 and investigated their phenotypic effects. Phenotypes were shown to cluster by taxon, indicating  
32 *tb1* may underlie morphological diversification of *Zea*. Additional analysis in Studer and Doebley

1 (2012) suggested tillering index was controlled both by *tb1* and loci elsewhere in the genome.  
2 Clues to the identity of these loci may be found in QTL studies that have identified loci  
3 controlling branching architecture (e.g., Doebley and Stec 1991, 1993). Many of these loci (*grassy*  
4 *tillers*, *gt1*; *tassel-replaces-upper-ears1*, *tru1*; *terminal ear1*, *te1*) have been shown to interact with  
5 *tb1* (Whipple et al., 2011; Li, 2012), and both *tru1* and *te1* affect the same phenotypic traits as  
6 *tb1* (Doebley et al., 1995). *tru1*, for example, has been shown to act either epistatically or  
7 downstream of *tb1*, affecting both branching architecture (decreased apical dominance) and tassel  
8 phenotypes (shortened tassel and shank length and reduced tassel number; Li 2012). Variation in  
9 these additional loci may have affected tillering in our collections and contributed to the lack of  
10 correlation we see between *Hopscotch* genotype and tillering. Finally, although photoperiod for  
11 Phenotyping 2 reasonably approximated that of the normal *parviglumis* growing season,  
12 greenhouse-specific environmental conditions (plant density, light regime, etc...) may have  
13 contributed to tillering responses different from those found in nature, obscuring the effect of the  
14 *Hopscotch* insertion on variation.

15 In conclusion, our findings demonstrate that the *Hopscotch* allele is more widespread in  
16 populations of *parviglumis* and *mexicana* than previously thought. Analysis of linkage using SNPs  
17 from across chromosome 1 does not suggest that the *Hopscotch* allele is present in these  
18 populations due to recent introgression; however, it seems unlikely that the insertion would have  
19 drifted to high frequency in multiple populations. We do, however, find preliminary evidence of  
20 selection on the *tb1* locus in *parviglumis*; this coupled with our observation of high frequency of  
21 the *Hopscotch* insertion in a number of populations suggests that the locus may play an ecological  
22 role in teosinte. In contrast to domesticated maize, the *Hopscotch* insertion does not appear to  
23 have a large effect on tillering in *parviglumis*. Future studies should examine expression levels of  
24 *tb1* in teosinte with and without the *Hopscotch* insertion and further characterize the effects of  
25 additional loci involved in branching architecture (e.g. *gt1*, *tru1*, and *te1*). These data, in  
26 conjunction with more exhaustive phenotyping, should help reveal the ecological significance of  
27 the domesticated *tb1* allele in natural populations of teosinte.

## LITERATURE CITED

1

2 BAACK, E., Y. SAPIR, M. CHAPMAN, J. BURKE, AND L. RIESEBERG. 2008. Selection on  
3 domestication traits and quantitative trait loci in crop-wild sunflower hybrids. *Mol Ecol* 17:  
4 666–677.

5 BAI, Y. AND P. LINDHOUT. 2007. Domestication and breeding of tomatoes: What have we  
6 gained and what can we gain in the future? *Annals of Botany* 100: 1085–1094.

7 BARRETT, S. 1983. Crop mimicry in weeds. *Econ Bot* 37: 255–282.

8 BRADBURY, P., Z. ZHANG, D. KROON, T. CASSTEVENS, Y. RAMDOSS, AND E. BUCKLER.  
9 2007. Tassel: software for association mapping of complex traits in diverse samples.  
10 *Bioinformatics* 23: 2633–2635.

11 BRIGGS, W., M. McMULLEN, B. GAUT, AND J. DOEBLEY. 2007. Linkage mapping of  
12 domestication loci in a large maize-teosinte backcross resource. *Genetics* 177: 1915–1928.

13 CHIA, J., C. SONG, P. BRADBURY, D. COSTICH, N. DE, LEON, J. DOEBLEY, R. ELSHIRE,  
14 B. GAUT, L. GELLER, J. GLAUBITZ, M. GORE, K. GUILL, J. HOLLAND, M. HUFFORD,  
15 J. LAI, M. LI, X. LIU, Y. LU, R. McCOMBIE, R. NELSON, J. POLAND, B. PRASANNA,  
16 T. PYHÄJÄRVI, T. RONG, R. SEKHON, Q. SUN, M. TENAILLON, F. TIAN, J. WANG, X. XU,  
17 Z. ZHANG, S. KAEPLER, J. ROSS-IBARRA, M. McMULLEN, E. BUCKLER, G. ZHANG,  
18 Y. XU, AND D. WARE. 2012. Maize hapmap2 identifies extant variation from a genome in flux.  
19 *Nat Genet* 44: 803–U238.

20 CLARK, R., T. WAGLER, P. QUIJADA, AND J. DOEBLEY. 2006. A distant upstream enhancer at  
21 the maize domestication gene *tb1* has pleiotropic effects on plant and inflorescent architecture.  
22 *Nat Genet* 38: 594–597.

23 COLOSIMO, P., K. HOSEMAN, S. BALABHADRA, G. VILLARREAL, M. DICKSON,  
24 J. GRIMWOOD, J. SCHMUTZ, R. MYERS, D. SCHLUTER, AND D. KINGSLEY. 2005.  
25 Widespread parallel evolution in sticklebacks by repeated fixation of ectodysplasin alleles.  
26 *Science* 307: 1928–1933.

27 COOK, J., M. McMULLEN, J. HOLLAND, F. TIAN, P. BRADBURY, J. ROSS-IBARRA,  
28 E. BUCKLER, AND S. FLINT-GARCIA. 2012. Genetic architecture of maize kernel composition  
29 in the nested association mapping and inbred association panels. *Plant Physiol* 158: 824–834.



- 1 COOP, G., D. WITONSKY, A. DI, RIENZO, AND J. PRITCHARD. 2010. Using environmental  
2 correlations to identify loci underlying local adaptation. *Genetics* 185: 1411–1423.
- 3 DOEBLEY, J. 2004. The genetics of maize evolution. *Annu Rev Genet* 38: 37–59.
- 4 DOEBLEY, J. AND A. STEC. 1991. Genetic-analysis of the morphological differences between  
5 maize and teosinte. *Genetics* 129: 285–295.
- 6 DOEBLEY, J. AND A. STEC. 1993. Inheritance of the morphological differences between maize  
7 and teosinte: Comparison of results for two F<sub>2</sub> populations. *Genetics* 134: 559–570.
- 8 DOEBLEY, J., A. STEC, AND C. GUSTUS. 1995. *teosinte branched1* and the origin of maize:  
9 Evidence for epistasis and the evolution of dominance. *Genetics* 141: 333–346.
- 10 DOEBLEY, J., A. STEC, AND L. HUBBARD. 1997. The evolution of apical dominance in maize.  
11 *Nature* 386: 485–488.
- 12 DOYLE, J. AND J. DOYLE. 1990. A rapid total dna preparation procedure for small quantities of  
13 fresh tissue. *Phytochemical Bulletin* 19: 11–15.
- 14 ELLSTRAND, N., L. GARNER, S. HEGDE, R. GUADAGNUOLO, AND L. BLANCAS. 2007.  
15 Spontaneous hybridization between maize and teosinte. *Journal of Heredity* 98: 183–187.
- 16 ELLSTRAND, N., H. PRENTICE, AND J. HANCOCK. 1999. Gene flow and introgression from  
17 domesticated plants into their wild relatives. *Annu Rev Ecol Syst* 30: 539–563.
- 18 FALUSH, D., M. STEPHENS, AND J. PRITCHARD. 2003. Inference of population structure using  
19 multilocus genotype data: Linked loci and correlated allele frequencies. *Genetics* 164:  
20 1567–1587.
- 21 FAO/IIASA/ISRIC/ISSCAS/JRC. 2012. Harmonized World Soil Database, version 1.2. FAO,  
22 Rome, Italy and IIASA, Laxenburg, Austria.
- 23 FEDER, J., S. BERLOCHER, J. ROETHELE, H. DAMBROSKI, J. SMITH, W. PERRY,  
24 V. GAVRILOVIC, K. FILCHAK, J. RULL, AND M. ALUJA. 2003. Allopatric genetic origins for  
25 sympatric host-plant shifts and race formation in rhagoletis. *P Natl Acad Sci Usa* 100:  
26 10314–10319.

- 1 FOX, J. AND S. WEISBERG. 2011. An R Companion to Applied Regression, vol. Second Edition.  
2 Sage, Thousand Oaks, CA.
- 3 FUKUNAGA, K., T. NUSSBAUM-WAGLER, B. LI, Q. ZHAO, Y. VIGOUROUX, M. FALLER,  
4 K. BOMBLIES, L. LUKENS, AND J. DOEBLEY. 2005. Genetic diversity and population  
5 structure of teosinte. *Genetics* 169: 2241–2254.
- 6 GALLAVOTTI, A., Q. ZHAO, J. KYOZUKA, R. MEELEY, M. RITTER, J. DOEBLEY, M. PE, AND  
7 R. SCHMIDT. 2004. The role of barren stalk1 in the architecture of maize. *Nature* 432: 630–635.
- 8 GERKE, J., J. EDWARDS, G. KE, J. ROSS-IBARRA, AND M. MCMULLEN. 2013. The genomic  
9 impacts of drift and selection for hybrid performance in maize. *arXiv* 1307.7313.
- 10 GOUDET, J. 2005. Hierfstat, a package for r to compute and test hierarchical f-statistics. *Mol*  
11 *Ecol Notes* 5: 184–186.
- 12 HUBNER, S., T. GUNTHER, A. FLAVELL, E. FRIDMAN, A. GRANER, A. KOROL, AND  
13 K. SCHMID. 2012. Islands and streams: clusters and gene flow in wild barley populations from  
14 the levant. *Mol Ecol* 21: 1115–1129.
- 15 HUFFORD, M. 2010. Genetic and ecological approaches to guide conservation of teosinte (*zea*  
16 *mays* ssp. *parviglumis*), the wild progenitor of maize. *PhD Dissertation* : 130pp.
- 17 HUFFORD, M., P. BILINSKI, T. PYHÄJÄRVI, AND J. ROSS-IBARRA. 2012a. Teosinte as a model  
18 system for population and ecological genomics. *Trends in Genetics* 12: 606–615.
- 19 HUFFORD, M., P. LUBINSKY, T. PYHÄJÄRVI, M. DEVENGENZO, N. ELLSTRAND, AND  
20 J. ROSS-IBARRA. 2013. The genomic signature of crop-wild introgression in maize. *PLoS*  
21 *Genetics* 9: e1003477.
- 22 HUFFORD, M., X. XU, J. VAN, HEERWAARDEN, T. PYHÄJÄRVI, J. CHIA, R. CARTWRIGHT,  
23 R. ELSHIRE, J. GLAUBITZ, K. GUILL, S. KAEPLER, J. LAI, P. MORRELL, L. SHANNON,  
24 C. SONG, N. SPRINGER, R. SWANSON-WAGNER, P. TIFFIN, J. WANG, G. ZHANG,  
25 J. DOEBLEY, M. MCMULLEN, D. WARE, E. BUCKLER, S. YANG, AND J. ROSS-IBARRA.  
26 2012b. Comparative population genomics of maize domestication and improvement. *Nat Genet*  
27 44: 808–U118.

- 1 KEARSE, M., R. MOIR, A. WILSON, S. STONES-HAVAS, M. CHEUNG, S. STURROCK,  
2 S. BUXTON, A. COOPER, S. MARKOWITZ, C. DURAN, T. THIERER, B. ASHTON,  
3 P. MEINTJES, AND A. DRUMMOND. 2012. Geneious basic: An integrated and extendable  
4 desktop software platform for the organization and analysis of sequence data. *Bioinformatics*  
5 28: 1647–1649.
- 6 KEBROM, T. AND T. BRUTNELL. 2007. The molecular analysis of the shade avoidance syndrome  
7 in the grasses has begun. *Journal of Experimental Botany* 58: 3079–3089.
- 8 KITANO, J., D. BOLNICK, D. BEAUCHAMP, M. MAZUR, S. MORI, T. NAKANO, AND  
9 C. PEICHEL. 2008. Reverse evolution of armor plates in the threespine stickleback. *Curr Biol*  
10 18: 769–774.
- 11 KOVACH, M. AND S. MCCOUCH. 2008. Leveraging natural diversity: back through the  
12 bottleneck. *Genome studies and Molecular Genetics* 11: 193–200.
- 13 LI, W. 2012. Tassels replace upper ears1 encodes a putative transcription factor that regulates  
14 maize shoot architecture by multiple pathways. *PhD Dissertation* : 122.
- 15 LUKENS, L. AND J. DOEBLEY. 1999. Epistatic and environmental interactions for quantitative  
16 trait loci involved in maize evolution. *Genet Res* 74: 291–302.
- 17 MALOOF, M., K. SOLIMAN, R. JORGENSEN, AND R. ALLARD. 1984. Ribosomal dna spacer  
18 length polymorphisms in barley - mendelian inheritance, chromosomal location, and population  
19 dynamics. *P Natl Acad Sci Usa* 81: 8014–8018.
- 20 MATSUOKA, Y., Y. VIGOUROUX, M. GOODMAN, G. SANCHEZ, E. BUCKLER, AND  
21 J. DOEBLEY. 2002. A single domestication for maize shown by multilocus microsatellite  
22 genotyping. *P Natl Acad Sci Usa* 99: 6080–6084.
- 23 MOELLER, D. A., M. I. TENAILLON, AND P. TIFFIN. 2007. Population structure and its effects  
24 on patterns of nucleotide polymorphism in teosinte (*zea mays* ssp. *parviglumis*). *Genetics* 176:  
25 1799–1809.
- 26 OLSEN, K. AND B. GROSS. 2010. Genetic perspectives on crop domestication. *Trends in Plant*  
27 *Science* 15: 529–537.

- 1 PIPERNO, D., A. RANERE, I. HOLST, J. IRIARTE, AND R. DICKAU. 2009. Starch grain and  
2 phytolith evidence for early ninth millennium bp maize from the central balsas river valley,  
3 mexico. *P Natl Acad Sci Usa* 106: 5019–5024.
- 4 PLANTINGA, T., S. ALONSO, N. IZAGIRRE, M. HERVELLA, R. FREGEL, J. VAN DER MEER,  
5 M. NETEA, AND C. DE LA RUA. 2012. Low prevalence of lactase persistence in neolithic  
6 south-west europe. *Eur J Hum Genet* 20: 778–782.
- 7 PYHÄJÄRVI, T., M. HUFFORD, AND J. ROSS-IBARRA. 2013. Complex patterns of local  
8 adaptation in the wild relatives of maize. *Genome Biology and Evolution* 5: 1594–1609.
- 9 ROSS-IBARRA, J., P. MORRELL, AND B. GAUT. 2007. Plant domestication, a unique  
10 opportunity to identify the genetic basis of adaptation. *P Natl Acad Sci Usa* 104: 8641–8648.
- 11 ROSS-IBARRA, J., M. TENAILLON, AND B. GAUT. 2009. Historical divergence and gene flow in  
12 the genus *zea*. *Genetics* 181: 1399–1413.
- 13 ROZEN, S. AND H. SKALETSKY. 2000. Primer3 on the www for general users and for biologist  
14 programmers. *Methods in Molecular Biology* : 365–386.
- 15 SIGMON, B. AND E. VOLLBRECHT. 2010. Evidence of selection at the ramosal locus during  
16 maize domestication. *Mol Ecol* 19: 1296–1311.
- 17 STUDER, A. AND J. DOEBLEY. 2012. Evidence for a natural allelic series at the maize  
18 domestication locus *teosinte branched1*. *Genetics* 19: 951–958.
- 19 STUDER, A., Q. ZHAO, J. ROSS-IBARRA, AND J. DOEBLEY. 2011. Identification of a functional  
20 transposon insertion in the maize domestication gene *tb1*. *Nat Genet* 43: 1160–U164.
- 21 THORNTON, K. 2003. libsequence: a c++ class library for evolutionary genetic analysis.  
22 *Bioinformatics* 19: 2325–2327.
- 23 THURBER, C., M. REAGON, B. GROSS, K. OLSEN, Y. JIA, AND A. CAICEDO. 2010. Molecular  
24 evolution of shattering loci in us weedy rice. *Mol Ecol* 19: 3271–3284.
- 25 TISHKOFF, S., F. REED, A. RANCIARO, B. VOIGHT, C. BABBITT, J. SILVERMAN, K. POWELL,  
26 H. MORTENSEN, J. HIRBO, M. OSMAN, M. IBRAHIM, S. OMAR, G. LEMA, T. NYAMBO,  
27 J. GHORI, S. BUMPSTEAD, J. PRITCHARD, G. WRAY, AND P. DELOUKAS. 2007. Convergent  
28 adaptation of human lactase persistence in africa and europe. *Nat Genet* 39: 31–40.

- 1 VAN HEERWAARDEN, J., J. DOEBLEY, W. BRIGGS, J. GLAUBITZ, M. GOODMAN,  
2 J. GONZALEZ, AND J. ROSS-IBARRA. 2011. Genetic signals of origin, spread, and introgression  
3 in a large sample of maize landraces. *P Natl Acad Sci Usa* 108: 1088–1092.
- 4 WEBER, A., R. CLARK, L. VAUGHN, J. SANCHEZ-GONZALEZ, J. YU, B. YANDELL,  
5 P. BRADBURY, AND J. DOEBLEY. 2007. Major regulatory genes in maize contribute to  
6 standing variation in teosinte (*zea mays* ssp *parviglumis*). *Genetics* 177: 2349–2359.
- 7 WHIPPLE, C., T. KEBROM, A. WEBER, F. YANG, D. HALL, R. MEELEY, R. SCHMIDT,  
8 J. DOEBLEY, T. BRUTNELL, AND D. JACKSON. 2011. grassy tillers1 promotes apical  
9 dominance in maize and responds to shade signals in the grasses. *P Natl Acad Sci Usa* 108:  
10 E506–E512.
- 11 WHITTON, J., D. WOLF, D. ARIAS, A. SNOW, AND L. RIESBERG. 1997. The persistence of  
12 cultivar alleles in wild populations of sunflowers five generations after hybridization. *Theoretical*  
13 *and Applied Genetics* 95: 33–40.
- 14 WILKES, H. 1977. Hybridization of maize and teosinte, in mexico and guatemala and the  
15 improvement of maize. *Economic Botany* 31: 254–293.
- 16 WRIGHT, S. I., I. V. BI, S. G. SCHROEDER, M. YAMASAKI, J. F. DOEBLEY, M. D.  
17 McMULLEN, AND B. S. GAUT. 2005. The effects of artificial selection on the maize genome.  
18 *Science* 308: 1310–1314.
- 19 ZHANG, L., Q. ZHU, Z. WU, J. ROSS-IBARRA, B. GAUT, S. GE, AND T. SANG. 2009. Selection  
20 on grain shattering genes and rates of rice domestication. *New Phytol* 184: 708–720.

Table 1. Pairwise  $F_{ST}$  values from sequence and *Hopscotch* genotyping data

| Comparison  | Region 1 | Region 2 | <i>Hopscotch</i> |
|-------------|----------|----------|------------------|
| EjuA & EjuB | 0        | 0        | 0                |
| EjuA & MSA  | 0.326    | 0.328    | 0.186            |
| EjuA & SLO  | 0.416    | 0.258    | 0.280            |
| EjuB & MSA  | 0.397    | 0.365    | 0.188            |
| EjuB & SLO  | 0.512    | 0.290    | 0.280            |
| MSA & SLO   | 0.007    | 0        | 0.016            |

Table 2. Population genetic statistics from resequenced regions near the *tb1* locus

| Population                      | # Haplotypes | Hap. Diversity | $\hat{\theta}_\pi$ | Tajima's D |
|---------------------------------|--------------|----------------|--------------------|------------|
| <i>Region 1 (5' UTR)</i>        |              |                |                    |            |
| EJUA                            | 8            | 0.859          | 0.005              | -1.650     |
| EJUB                            | 5            | 0.709          | 0.004              | -1.831     |
| MSA                             | 6            | 0.682          | 0.004              | -1.755     |
| SLO                             | 3            | 0.318          | 0.001              | -0.729     |
| <i>Region 2 (66kb upstream)</i> |              |                |                    |            |
| EJUA                            | 8            | 0.894          | 0.018              | 0.623      |
| EJUB                            | 8            | 0.894          | 0.016              | 0.295      |
| MSA                             | 3            | 0.682          | 0.011              | -0.222     |
| SLO                             | 4            | 0.742          | 0.014              | 0.932      |

Table 3. mean  $r^2$  values between SNPs on chromosome 1, in the broad *tb1* region, within the 5' UTR of *tb1* (Region 1), and 66kb upstream of *tb1* (Region 2).

| Population  | Chr. 1 | <i>tb1</i> region | Region 1 | Region 2 |
|-------------|--------|-------------------|----------|----------|
| Ejutla A    | 0.095  | 0.050             | 0.747    | 0.215    |
| Ejutla B    | 0.069  | 0.051             | 0.660    | 0.186    |
| La Mesa     | 0.070  | 0.053             | 0.914    | 0.766    |
| San Lorenzo | 0.101  | 0.067             | 0.912    | 0.636    |

Table 4. Assignments to maize and teosinte in the *tb1* and chromosome 1 regions from STRUCTURE

| Population  | <i>tb1</i> region |          | Chr 1 |          |
|-------------|-------------------|----------|-------|----------|
|             | Maize             | Teosinte | Maize | Teosinte |
| Ejutla A    | 0.022             | 0.978    | 0.203 | 0.797    |
| Ejutla B    | 0.019             | 0.981    | 0.187 | 0.813    |
| La Mesa     | 0.012             | 0.988    | 0.193 | 0.807    |
| San Lorenzo | 0.016             | 0.984    | 0.205 | 0.795    |

Figure 1. Map showing the frequency of the *Hopscotch* allele in populations of *parviglumis* where we sampled more than 6 individuals. Size of circles reflects number of alleles sampled.

Figure 2. Linkage disequilibrium for SNPs in Mb 261-268 on chromosome 1. The yellow rectangle indicates the location of the *Hopscotch* insertion and the green represents the *tb1* ORF. A) Ejutla A; B) Ejutla B; C) La Mesa; D) San Lorenzo. The upper triangle above the black diagonal is colored based on the  $r^2$  value between SNPs while the bottom triangle is colored based on p-value for the corresponding  $r^2$  value.

Figure 3. STRUCTURE assignment to maize across a section of chromosome 1. The dotted lines mark the beginning of the sequenced region 66kb upstream (Region 2) and the end of the *tb1* ORF.

Figure 4. Box-plots showing tillering index in greenhouse grow-outs for Phenotyping 1 (A) and Phenotyping 2 (B). White indicates individuals homozygous for the *Hopscotch*, light grey represents heterozygotes, and dark grey represents homozygotes for the teosinte (No *Hopscotch*) allele. Within boxes, dark black lines represent the median, and the edges of the boxes are the first and third quartiles. Outliers are displayed as dots, the maximum value excluding outliers is shown with the top whisker, while the minimum excluding outliers is shown with the bottom whisker.



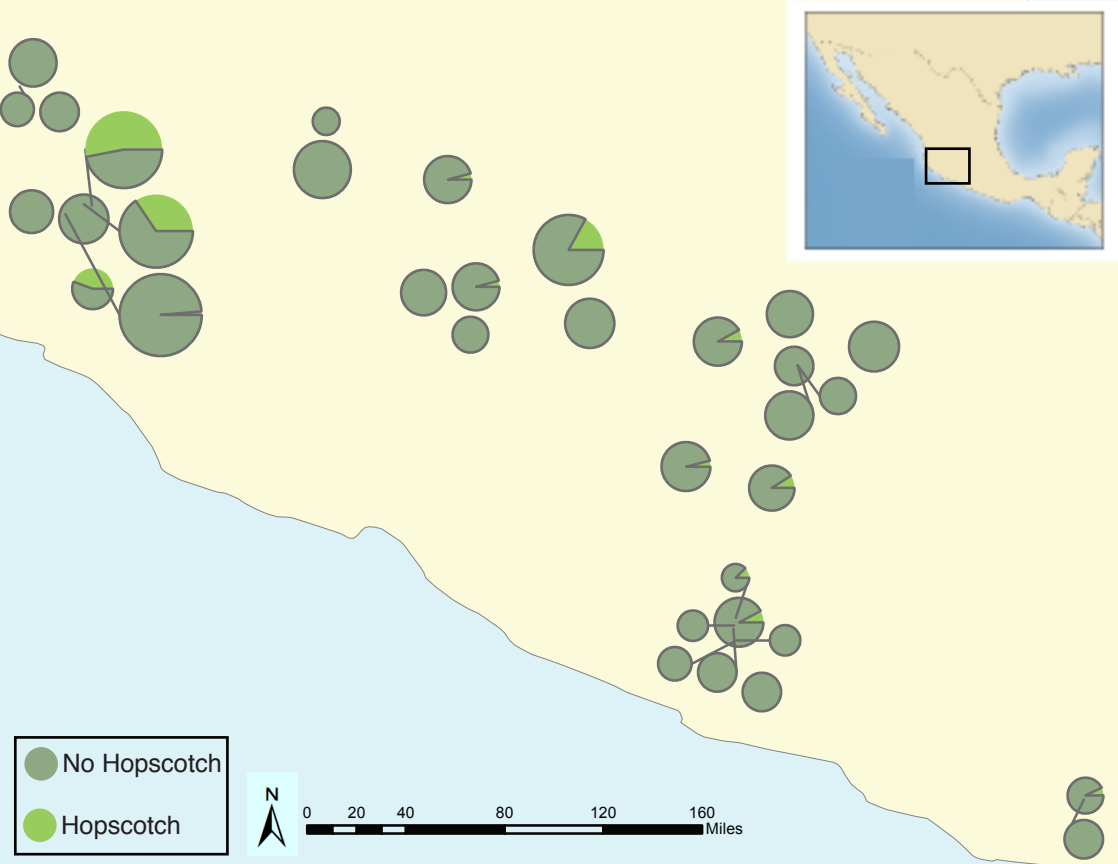

A.

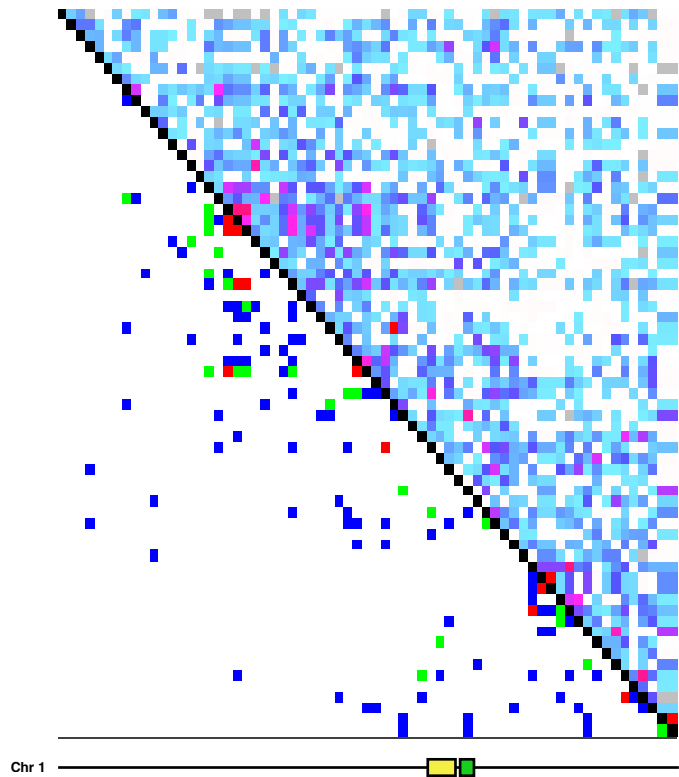

B.

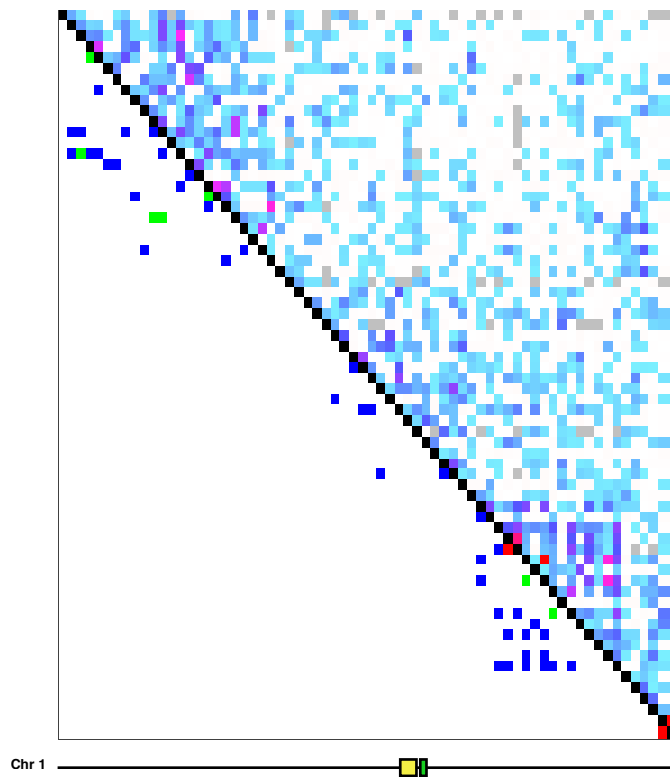

R squared

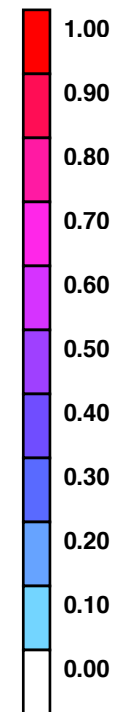

C.

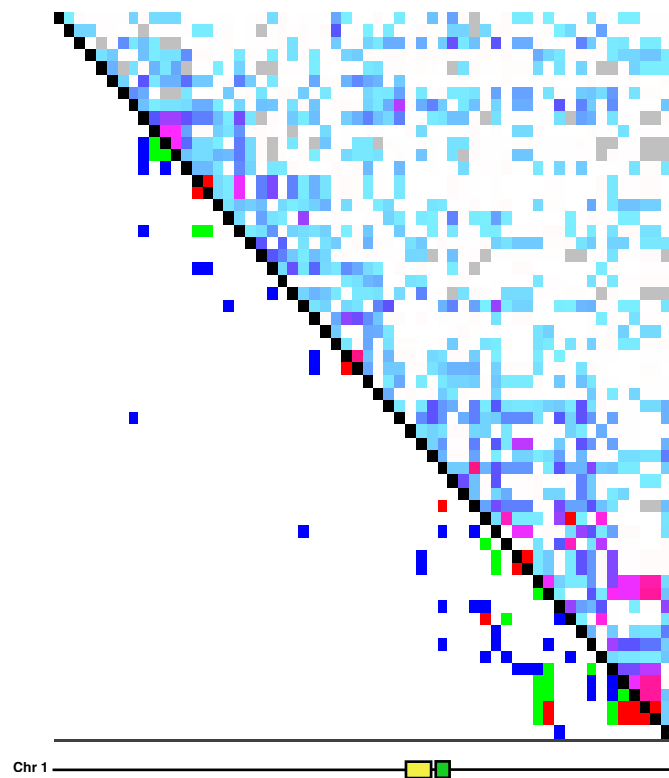

D.

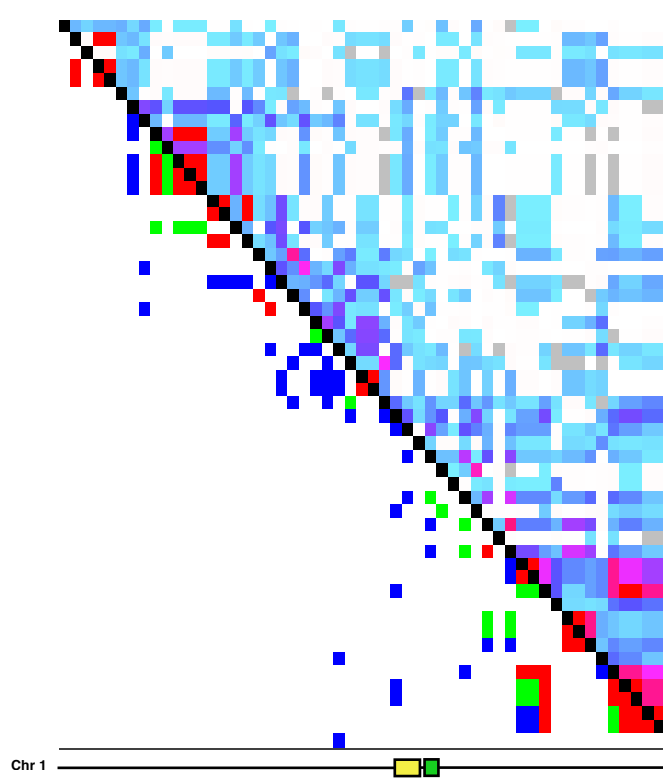

P value

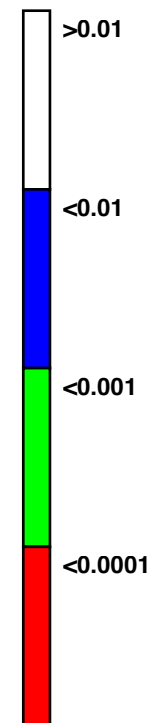

# tb1 region

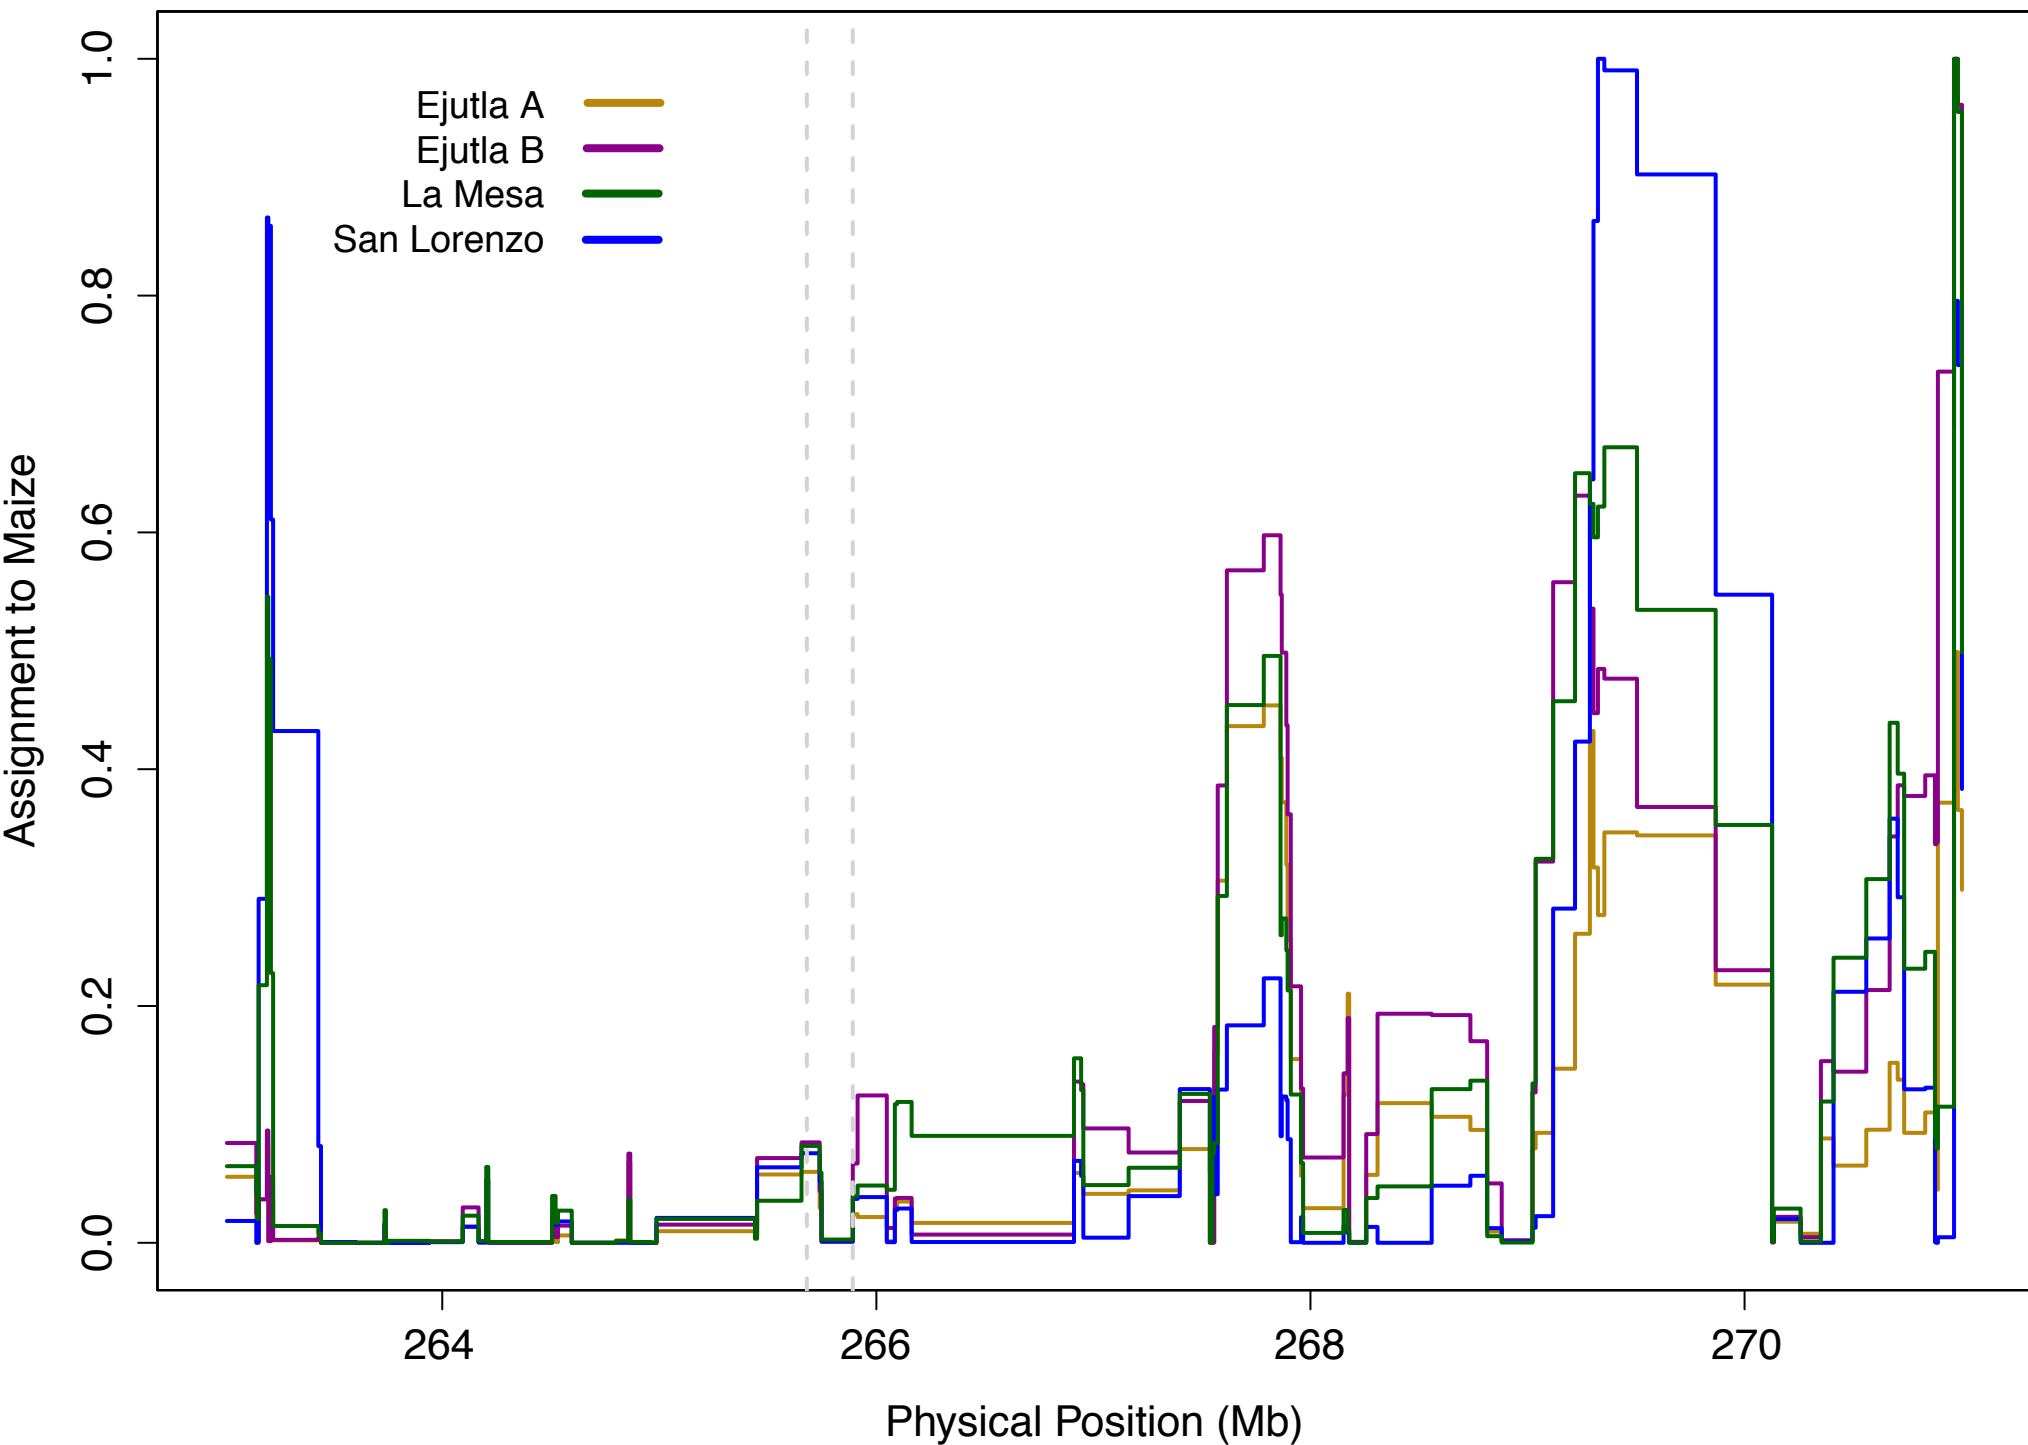



Appendix S1: Accessions of *Zea mays* ssp. *mexicana* (RIMME) and *Zea mays* ssp. *parviglumis* (RIMPA) sampled. RIHY is a *Z. mays* ssp. *parviglumis* and *Zea mays* ssp. *mays* hybrid.

| Accession | USDA ID | Locality         | Alleles Sampled | Hopscotch Freq. | No Hopscotch Freq. |
|-----------|---------|------------------|-----------------|-----------------|--------------------|
| RIHY0009  | N/A     | N/A              | 2               | 0.5             | 0.5                |
| RIMME0006 | 566673  | Durango          | 2               | 0               | 1                  |
| RIMME0007 | 566680  | Guanaajuato      | 2               | 0               | 1                  |
| RIMME0008 | 566681  | Michoacan        | 2               | 0               | 1                  |
| RIMME0009 | 566682  | Distrito Federal | 2               | 0               | 1                  |
| RIMME0011 | 566685  | Mexico           | 2               | 0               | 1                  |
| RIMME0014 | 714151  | Breeders line    | 6               | 0               | 1                  |
| RIMME0017 | 699874  | Ayotlan          | 8               | 0               | 1                  |
| RIMME0021 | N/A     | El Porvenir      | 69              | 0.17            | 0.83               |
| RIMME0026 | N/A     | Opopeo           | 42              | 0.07            | 0.93               |
| RIMME0028 | N/A     | Puruandiro       | 28              | 0.04            | 0.96               |
| RIMME0029 | N/A     | Ixtlan           | 35              | 0               | 1                  |
| RIMME0030 | N/A     | San Pedro        | 27              | 0               | 1                  |
| RIMME0031 | N/A     | Tenango del Aire | 25              | 0.08            | 0.92               |
| RIMME0032 | N/A     | Nabogame         | 24              | 0               | 1                  |
| RIMME0033 | N/A     | Puerta Encantada | 25              | 0               | 1                  |
| RIMME0034 | N/A     | Santa Clara      | 23              | 0               | 1                  |
| RIMME0035 | N/A     | Xochimilco       | 25              | 0               | 1                  |
| RIMPA0001 | 87168   | El Salado        | 4               | 0               | 1                  |
| RIMPA0003 | 87171   | Mazatlan         | 8               | 0.13            | 0.87               |
| RIMPA0017 | 87200   | N/A              | 4               | 0               | 1                  |
| RIMPA0019 | 87213   | El Salado        | 2               | 0.50            | 0.50               |
| RIMPA0029 | 87244   | N/A              | 2               | 0.50            | 0.50               |
| RIMPA0031 | 87249   | N/A              | 2               | 0.5             | 0.5                |
| RIMPA0035 | 87288   | Jalisco          | 4               | 0               | 1                  |
| RIMPA0040 | 288185  | Mexico           | 4               | 0               | 1                  |
| RIMPA0042 | 288187  | Guerrero         | 4               | 0.25            | 0.75               |
| RIMPA0043 | 288188  | Guerrero         | 4               | 0               | 1                  |
| RIMPA0045 | 288193  | Guerrero         | 4               | 0               | 1                  |
| RIMPA0055 | 714152  | Breeders line    | 2               | 0               | 1                  |
| RIMPA0056 | 714153  | Breeders line    | 2               | 0.50            | 0.50               |
| RIMPA0057 | 714154  | Breeders line    | 2               | 0.50            | 0.50               |
| RIMPA0058 | N/A     | N/A              | 4               | 0.50            | 0.50               |
| RIMPA0059 | N/A     | N/A              | 4               | 1               | 0                  |
| RIMPA0060 | 714157  | Breeders line    | 2               | 0               | 1                  |
| RIMPA0061 | 714158  | Breeders line    | 4               | 0.5             | 0.5                |
| RIMPA0062 | 714159  | Breeders line    | 4               | 0.5             | 0.5                |
| RIMPA0063 | 714160  | Breeders line    | 4               | 0               | 1                  |
| RIMPA0064 | 714161  | Breeders line    | 3               | 0               | 1                  |
| RIMPA0065 | 714162  | Breeders line    | 4               | 0.25            | 0.75               |
| RIMPA0068 | 699861  | Jalisco, Mexico  | 16              | 0               | 1                  |
| RIMPA0069 | 699862  | Ixtlan           | 14              | 0.14            | 0.86               |
| RIMPA0070 | 699863  | Benito Juarez    | 16              | 0               | 1                  |
| RIMPA0071 | 699864  | Tuzantla         | 28              | 0               | 1                  |
| RIMPA0072 | 699865  | Tiquicheo        | 16              | 0               | 1                  |
| RIMPA0073 | 699866  | Tiquicheo        | 16              | 0.12            | 0.88               |
| RIMPA0074 | 699867  | Huetamo          | 12              | 0               | 1                  |
| RIMPA0075 | 699868  | Huetamo          | 2               | 0               | 1                  |
| RIMPA0076 | 699869  | Huetamo          | 4               | 0               | 1                  |
| RIMPA0077 | 699870  | Caracuaro        | 2               | 0               | 1                  |
| RIMPA0078 | 699871  | Caracuaro        | 2               | 0.5             | 0.5                |
| RIMPA0079 | 699872  | Villa Madero     | 14              | 0               | 1                  |
| RIMPA0080 | 699873  | Guachinango      | 12              | 0               | 1                  |
| RIMPA0081 | 699875  | Ameca            | 16              | 0               | 1                  |
| RIMPA0083 | 699877  | Tepoztlan        | 14              | 0               | 1                  |
| RIMPA0084 | 699878  | Tepoztlan        | 16              | 0               | 1                  |
| RIMPA0085 | 699879  | Miahuatlan       | 16              | 0               | 1                  |
| RIMPA0086 | 699880  | Miahuatlan       | 16              | 0.06            | 0.94               |
| RIMPA0087 | 699881  | Tecoanapa        | 24              | 0               | 1                  |
| RIMPA0089 | 699883  | Guerrero         | 12              | 0               | 1                  |
| RIMPA0090 | 699884  | Guerrero         | 10              | 0               | 1                  |
| RIMPA0091 | 699885  | Guerrero         | 16              | 0               | 1                  |
| RIMPA0092 | 699886  | Guerrero         | 10              | 0               | 1                  |

| Accession | USDA ID | Locality  | Alleles Sampled | <i>Hopscotch</i> Freq. | No <i>Hopscotch</i> Freq. |
|-----------|---------|-----------|-----------------|------------------------|---------------------------|
| RIMPA0093 | 699887  | Guerrero  | 26              | 0.08                   | 0.92                      |
| RIMPA0094 | 699888  | Guerrero  | 2               | 0                      | 1                         |
| RIMPA0095 | 699889  | Guerrero  | 4               | 0                      | 1                         |
| RIMPA0096 | 699890  | Guerrero  | 26              | 0.04                   | 0.96                      |
| RIMPA0097 | 699891  | Guerrero  | 6               | 0                      | 1                         |
| RIMPA0098 | 699892  | Guerrero  | 4               | 0                      | 1                         |
| RIMPA0099 | 699893  | Guerrero  | 4               | 0                      | 1                         |
| RIMPA0100 | 699894  | Guerrero  | 6               | 0                      | 1                         |
| RIMPA0101 | 699895  | Guerrero  | 2               | 0                      | 1                         |
| RIMPA0103 | 699897  | Guerrero  | 2               | 0                      | 1                         |
| RIMPA0104 | 699898  | Guerrero  | 22              | 0.09                   | 0.91                      |
| RIMPA0105 | 699899  | Guerrero  | 6               | 0                      | 1                         |
| RIMPA0106 | 699900  | Guerrero  | 6               | 0.33                   | 0.67                      |
| RIMPA0107 | 699901  | Guerrero  | 4               | 0                      | 1                         |
| RIMPA0108 | 699902  | Guerrero  | 6               | 0                      | 1                         |
| RIMPA0109 | 699903  | Michoacan | 4               | 0.25                   | 0.75                      |
| RIMPA0110 | 699904  | Michoacan | 2               | 0                      | 1                         |
| RIMPA0111 | 699905  | Michoacan | 4               | 0                      | 1                         |
| RIMPA0112 | 699906  | Michoacan | 4               | 0.25                   | 0.75                      |
| RIMPA0114 | 699908  | Michoacan | 6               | 0.17                   | 0.83                      |
| RIMPA0116 | 699910  | Mexico    | 2               | 0                      | 1                         |
| RIMPA0117 | 699911  | Mexico    | 4               | 0                      | 1                         |
| RIMPA0118 | 699912  | Mexico    | 6               | 0.17                   | 0.83                      |
| RIMPA0119 | 699913  | Mexico    | 2               | 0                      | 1                         |
| RIMPA0120 | 699914  | Mexico    | 1               | 1                      | 0                         |
| RIMPA0121 | 699915  | Mexico    | 2               | 0                      | 1                         |
| RIMPA0128 | 699922  | Mexico    | 2               | 0.5                    | 0.5                       |
| RIMPA0129 | 699923  | Michoacan | 2               | 0.5                    | 0.5                       |
| RIMPA0135 | 699929  | Nayarit   | 24              | 0                      | 1                         |
| RIMPA0138 | 699932  | Jalisco   | 2               | 0.5                    | 0.5                       |
| RIMPA0139 | 699933  | Jalisco   | 1               | 1                      | 0                         |
| RIMPA0142 | 699936  | Colima    | 18              | 0.44                   | 0.56                      |
| RIMPA0144 | 699938  | Jalisco   | 2               | 1                      | 0                         |
| RIMPA0145 | 699939  | Michoacan | 1               | 1                      | 0                         |
| RIMPA0147 | 699941  | Jalisco   | 1               | 1                      | 0                         |
| RIMPA0155 | N/A     | Jalisco   | 73              | 0.01                   | 0.99                      |
| RIMPA0156 | N/A     | Jalisco   | 20              | 0                      | 1                         |
| RIMPA0157 | N/A     | Jalisco   | 58              | 0.34                   | 0.66                      |
| RIMPA0158 | N/A     | Jalisco   | 64              | 0.53                   | 0.47                      |
| RIMPA0159 | N/A     | Jalisco   | 26              | 0                      | 1                         |
| RIMPA0162 | 21785   | N/A       | 4               | 0                      | 1                         |

Appendix S2: *Hopscotch* frequency in sampled *Zea mays* ssp. *mays* (RIMMA).

| Accession | Alleles Sampled | <i>Hopscotch</i> Freq. |
|-----------|-----------------|------------------------|
| RIMMA0066 | 2               | 1                      |
| RIMMA0075 | 2               | 1                      |
| RIMMA0077 | 2               | 1                      |
| RIMMA0079 | 2               | 1                      |
| RIMMA0081 | 2               | 1                      |
| RIMMA0084 | 2               | 1                      |
| RIMMA0086 | 2               | 1                      |
| RIMMA0088 | 2               | 1                      |
| RIMMA0089 | 2               | 1                      |
| RIMMA0090 | 2               | 1                      |
| RIMMA0092 | 4               | 1                      |
| RIMMA0094 | 4               | 1                      |
| RIMMA0097 | 2               | 1                      |
| RIMMA0099 | 2               | 1                      |
| RIMMA0100 | 2               | 1                      |
| RIMMA0101 | 2               | 1                      |
| RIMMA0104 | 2               | 1                      |
| RIMMA0108 | 2               | 1                      |
| RIMMA0111 | 6               | 1                      |
| RIMMA0115 | 2               | 1                      |
| RIMMA0117 | 2               | 1                      |
| RIMMA0130 | 2               | 1                      |
| RIMMA0133 | 2               | 1                      |
| RIMMA0134 | 2               | 1                      |
| RIMMA0135 | 2               | 1                      |
| RIMMA0142 | 2               | 0.5                    |
| RIMMA0143 | 4               | 1                      |
| RIMMA0146 | 4               | 1                      |
| RIMMA0149 | 2               | 1                      |
| RIMMA0152 | 2               | 1                      |
| RIMMA0153 | 2               | 1                      |
| RIMMA0154 | 2               | 1                      |
| RIMMA0155 | 2               | 1                      |
| RIMMA0156 | 2               | 1                      |
| RIMMA0157 | 2               | 1                      |
| RIMMA0158 | 2               | 1                      |
| RIMMA0159 | 2               | 1                      |
| RIMMA0160 | 2               | 1                      |
| RIMMA0162 | 2               | 1                      |
| RIMMA0166 | 2               | 1                      |
| RIMMA0167 | 2               | 1                      |
| RIMMA0168 | 2               | 1                      |
| RIMMA0169 | 2               | 1                      |
| RIMMA0172 | 2               | 1                      |
| RIMMA0174 | 4               | 1                      |
| RIMMA0177 | 2               | 1                      |
| RIMMA0178 | 2               | 1                      |
| RIMMA0179 | 2               | 1                      |
| RIMMA0181 | 2               | 1                      |
| RIMMA0183 | 2               | 1                      |
| RIMMA0184 | 2               | 1                      |
| RIMMA0186 | 2               | 1                      |
| RIMMA0187 | 1               | 1                      |
| RIMMA0188 | 2               | 1                      |
| RIMMA0195 | 2               | 1                      |
| RIMMA0196 | 2               | 1                      |
| RIMMA0197 | 2               | 1                      |
| RIMMA0198 | 2               | 1                      |
| RIMMA0199 | 2               | 1                      |
| RIMMA0200 | 2               | 1                      |
| RIMMA0202 | 2               | 1                      |
| RIMMA0203 | 2               | 1                      |
| RIMMA0206 | 2               | 1                      |
| RIMMA0208 | 2               | 1                      |
| RIMMA0209 | 2               | 1                      |

| Accession | Alleles Sampled | Hopscotch Freq. |
|-----------|-----------------|-----------------|
| RIMMA0210 | 2               | 1               |
| RIMMA0212 | 2               | 1               |
| RIMMA0213 | 2               | 1               |
| RIMMA0214 | 2               | 1               |
| RIMMA0217 | 2               | 1               |
| RIMMA0218 | 2               | 1               |
| RIMMA0220 | 2               | 1               |
| RIMMA0221 | 2               | 1               |
| RIMMA0222 | 2               | 1               |
| RIMMA0223 | 2               | 1               |
| RIMMA0226 | 2               | 1               |
| RIMMA0227 | 2               | 1               |
| RIMMA0228 | 2               | 1               |
| RIMMA0229 | 2               | 1               |
| RIMMA0230 | 2               | 1               |
| RIMMA0232 | 2               | 1               |
| RIMMA0233 | 2               | 1               |
| RIMMA0235 | 2               | 0.5             |
| RIMMA0242 | 2               | 1               |
| RIMMA0243 | 2               | 1               |
| RIMMA0247 | 4               | 1               |
| RIMMA0248 | 2               | 1               |
| RIMMA0249 | 2               | 1               |
| RIMMA0252 | 2               | 1               |
| RIMMA0253 | 2               | 1               |
| RIMMA0254 | 2               | 1               |
| RIMMA0256 | 2               | 1               |
| RIMMA0257 | 2               | 1               |
| RIMMA0258 | 2               | 1               |
| RIMMA0259 | 2               | 1               |
| RIMMA0260 | 2               | 1               |
| RIMMA0262 | 2               | 1               |
| RIMMA0263 | 2               | 1               |
| RIMMA0264 | 2               | 1               |
| RIMMA0265 | 2               | 1               |
| RIMMA0268 | 2               | 1               |
| RIMMA0269 | 2               | 1               |
| RIMMA0270 | 2               | 1               |
| RIMMA0272 | 2               | 1               |
| RIMMA0275 | 2               | 1               |
| RIMMA0276 | 2               | 1               |
| RIMMA0277 | 2               | 1               |
| RIMMA0279 | 2               | 1               |
| RIMMA0280 | 2               | 1               |
| RIMMA0283 | 2               | 1               |
| RIMMA0285 | 2               | 1               |
| RIMMA0288 | 2               | 1               |
| RIMMA0290 | 2               | 1               |
| RIMMA0291 | 2               | 1               |
| RIMMA0292 | 2               | 1               |
| RIMMA0293 | 2               | 1               |
| RIMMA0298 | 2               | 1               |
| RIMMA0302 | 2               | 1               |
| RIMMA0305 | 2               | 1               |
| RIMMA0310 | 2               | 1               |
| RIMMA0312 | 2               | 1               |
| RIMMA0320 | 2               | 1               |
| RIMMA0322 | 2               | 1               |
| RIMMA0324 | 2               | 1               |
| RIMMA0334 | 2               | 1               |
| RIMMA0336 | 2               | 1               |
| RIMMA0337 | 2               | 1               |
| RIMMA0338 | 2               | 1               |
| RIMMA0339 | 2               | 1               |
| RIMMA0340 | 2               | 1               |
| RIMMA0341 | 2               | 1               |
| RIMMA0342 | 2               | 1               |



| Accession | Alleles Sampled | Hopscotch Freq. |
|-----------|-----------------|-----------------|
| RIMMA0344 | 2               | 1               |
| RIMMA0346 | 2               | 1               |
| RIMMA0347 | 2               | 1               |
| RIMMA0350 | 2               | 1               |
| RIMMA0351 | 2               | 1               |
| RIMMA0352 | 2               | 1               |
| RIMMA0357 | 2               | 1               |
| RIMMA0360 | 18              | 1               |
| RIMMA0362 | 8               | 1               |
| RIMMA0363 | 16              | 1               |
| RIMMA0370 | 17              | 1               |
| RIMMA0372 | 24              | 1               |
| RIMMA0373 | 22              | 1               |
| RIMMA0408 | 2               | 1               |
| RIMMA0411 | 1               | 1               |
| RIMMA0413 | 1               | 1               |
| RIMMA0414 | 1               | 1               |
| RIMMA0424 | 8               | 0.9             |
| RIMMA0432 | 1               | 1               |
| RIMMA0434 | 2               | 0.5             |
| RIMMA0435 | 1               | 1               |
| RIMMA0442 | 2               | 1               |
| RIMMA0443 | 2               | 1               |
| RIMMA0444 | 2               | 1               |
| RIMMA0445 | 2               | 1               |
| RIMMA0446 | 2               | 1               |
| RIMMA0447 | 2               | 1               |
| RIMMA0448 | 2               | 1               |
| RIMMA0449 | 2               | 1               |
| RIMMA0450 | 2               | 1               |
| RIMMA0451 | 2               | 1               |
| RIMMA0452 | 2               | 1               |
| RIMMA0453 | 2               | 1               |
| RIMMA0454 | 2               | 1               |
| RIMMA0455 | 2               | 1               |
| RIMMA0456 | 2               | 1               |
| RIMMA0457 | 2               | 1               |
| RIMMA0458 | 2               | 1               |
| RIMMA0459 | 2               | 1               |
| RIMMA0483 | 2               | 1               |
| RIMMA0490 | 2               | 1               |
| RIMMA0515 | 2               | 1               |
| RIMMA0537 | 2               | 1               |
| RIMMA0550 | 2               | 1               |
| RIMMA0553 | 2               | 1               |
| RIMMA0559 | 2               | 1               |
| RIMMA0561 | 2               | 1               |
| RIMMA0562 | 2               | 1               |
| RIMMA0571 | 2               | 1               |
| RIMMA0572 | 2               | 1               |
| RIMMA0577 | 2               | 1               |
| RIMMA0579 | 2               | 1               |
| RIMMA0590 | 2               | 1               |
| RIMMA0591 | 2               | 1               |
| RIMMA0592 | 2               | 1               |
| RIMMA0593 | 2               | 1               |
| RIMMA0594 | 2               | 1               |
| RIMMA0595 | 2               | 1               |
| RIMMA0596 | 2               | 1               |
| RIMMA0597 | 2               | 1               |
| RIMMA0598 | 2               | 1               |
| RIMMA0599 | 2               | 1               |
| RIMMA0600 | 2               | 1               |
| RIMMA0601 | 2               | 1               |
| RIMMA0602 | 2               | 1               |
| RIMMA0603 | 2               | 1               |
| RIMMA0604 | 2               | 1               |

| <b>Accession</b> | <b>Alleles Sampled</b> | <b>Hopscotch Freq.</b> |
|------------------|------------------------|------------------------|
| RIMMA0605        | 2                      | 1                      |
| RIMMA0606        | 2                      | 1                      |
| RIMMA0607        | 2                      | 1                      |
| RIMMA0608        | 2                      | 1                      |
| RIMMA0609        | 2                      | 1                      |
| RIMMA0610        | 2                      | 1                      |
| RIMMA0611        | 2                      | 1                      |
| RIMMA0612        | 2                      | 1                      |
| RIMMA0613        | 2                      | 1                      |
| RIMMA0622        | 2                      | 0.5                    |
| RIMMA0624        | 1                      | 1                      |
| RIMMA0629        | 2                      | 0.5                    |
| RIMMA0631        | 2                      | 0.5                    |
| RIMMA0659        | 2                      | 1                      |
| RIMMA0660        | 2                      | 1                      |
| RIMMA0678        | 1                      | 1                      |
| RIMMA0681        | 2                      | 1                      |
| RIMMA0683        | 2                      | 1                      |
| RIMMA0684        | 2                      | 1                      |
| RIMMA0685        | 4                      | 1                      |
| RIMMA0693        | 2                      | 1                      |
| RIMMA0694        | 2                      | 1                      |
| RIMMA0695        | 1                      | 1                      |
| RIMMA0699        | 2                      | 1                      |
| RIMMA0704        | 2                      | 1                      |
| RIMMA0706        | 2                      | 1                      |
| RIMMA0711        | 1                      | 1                      |
| RIMMA0713        | 2                      | 1                      |
| RIMMA0715        | 2                      | 1                      |
| RIMMA0717        | 2                      | 1                      |
| RIMMA0718        | 2                      | 1                      |
| RIMMA0723        | 2                      | 1                      |
| RIMMA0724        | 2                      | 1                      |
| RIMMA0725        | 1                      | 1                      |
| RIMMA0728        | 1                      | 1                      |
| RIMMA0732        | 2                      | 1                      |
| RIMMA0734        | 2                      | 1                      |
| RIMMA0738        | 2                      | 1                      |
| RIMMA0739        | 2                      | 1                      |
| RIMMA0744        | 2                      | 1                      |
| RIMMA0747        | 1                      | 1                      |
| RIMMA0748        | 2                      | 1                      |
| RIMMA0749        | 2                      | 1                      |
| RIMMA0750        | 2                      | 0.5                    |
| RIMMA0751        | 1                      | 1                      |
| RIMMA0752        | 1                      | 1                      |
| RIMMA0753        | 2                      | 1                      |
| RIMMA0755        | 2                      | 1                      |

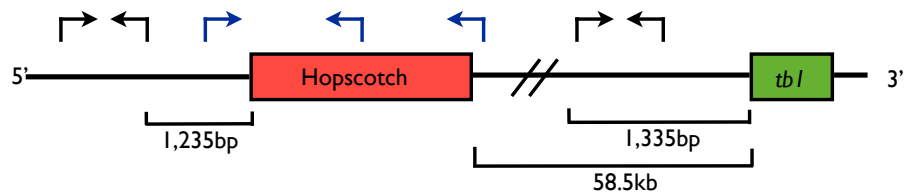

Appendix S3: Representation of the upstream regulatory region of *tb1*, showing the *tb1* coding region (green) and the *Hopscotch* insertion (red). Arrows show the location of primer sets; in black, primers used for amplification and sequencing (Region 1; within the 5' UTR, and Region 2; 66,169 bp upstream from the *tb1* ORF); in blue, primers used to genotype the *Hopscotch* insertion.

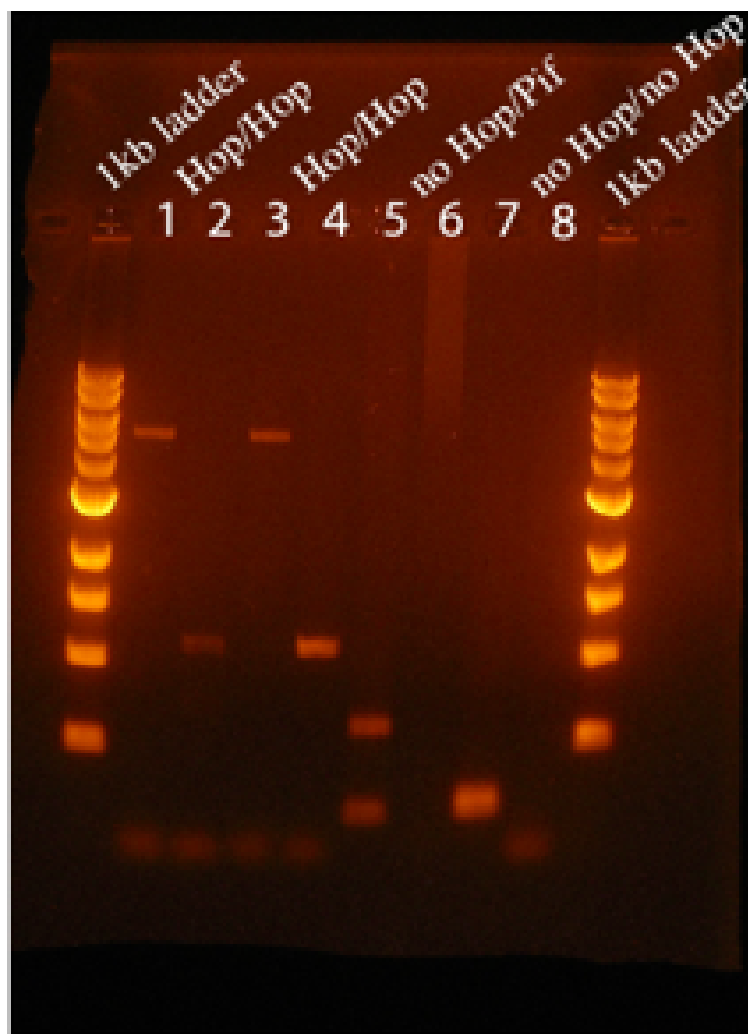

Appendix S4: Agarose gel image of amplification products using our primer sets. Genotypes are indicated at the top of the gel.

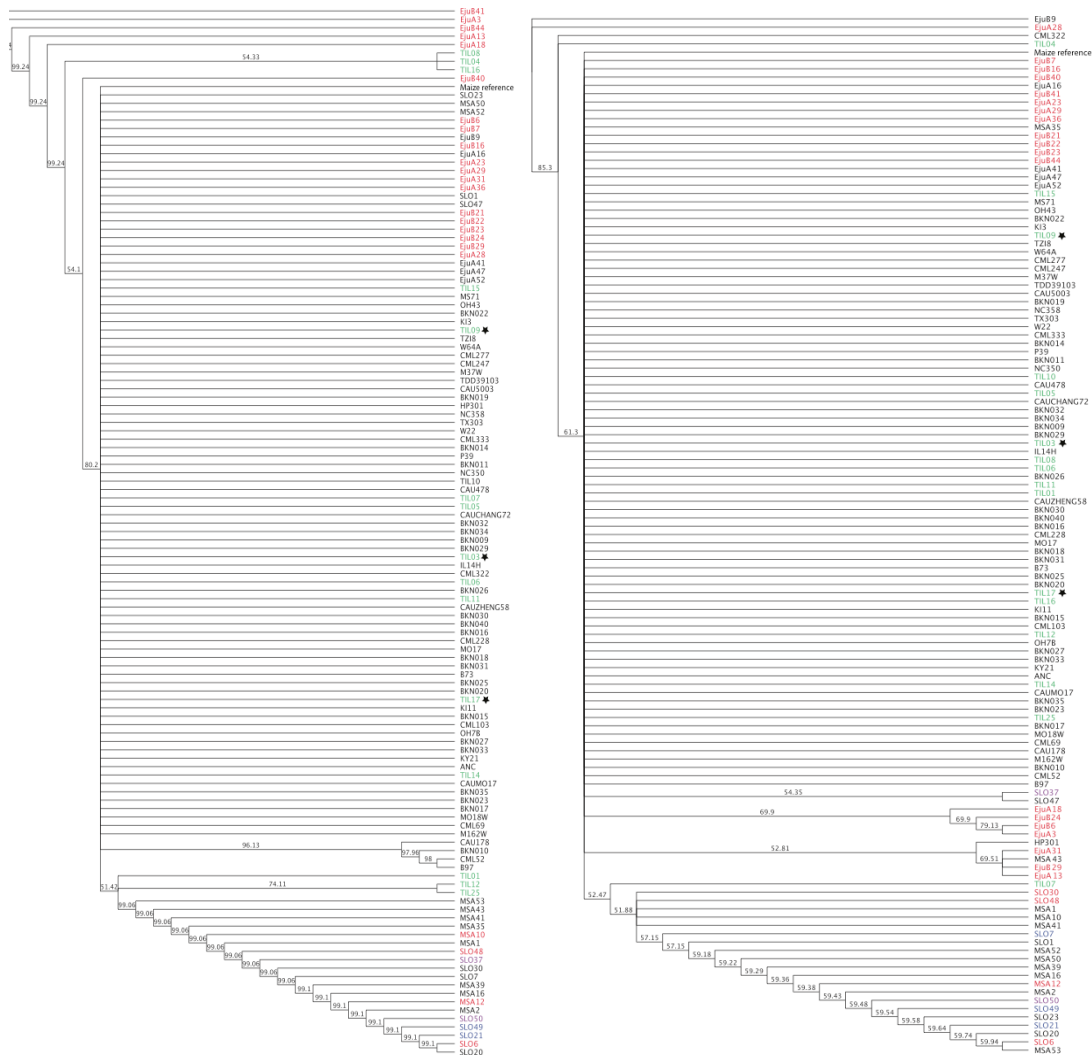

Appendix S5: Neighbor-joining tree of the sequenced region in the 5' UTR (right; Region 1) and the 66,169 bp upstream region (left; Region 2) of *tb1*. Individuals with genotype data are colored: Homozygous for the teosinte (no *Hopscotch*) allele (red), homozygous for the maize (*Hopscotch*) allele (blue), heterozygotes (purple). TILs (teosinte inbred lines) are colored in green, with stars indicating the 3 TILs known to have the *Hopscotch* insertion. Black indicates individuals not genotyped for the *Hopscotch* insertion.
